# Supplementary material for: Computational insights into the singlet–triplet energy gaps, ionization energies, and electron affinities for a diverse set of 812 small fullerenes (C20–C50)
Source: Royal Society of Chemistry journal article supplement (doi:10.1039/d3cp01357j), 2023-01-01
Supplement: d3cp01357j2.xlsx [file d3cp01357j2.xlsx]

## Sheet: def2-TZVP_energies
molecule	PBE	PBE0	TPSS	TPSS0	PBE	PBE0	TPSS	TPSS0	PBE	PBE0	TPSS	TPSS0	PBE	PBE0	TPSS	TPSS0
	singlet				triplet				cation				anion
C20_001	-760.851	-760.833	-761.89	-761.622	-760.846	-760.829	-761.886	-761.62	-760.605	-760.584	-761.648	-761.377	-760.929	-760.919	-761.966	-761.709
C24_001	-913.119	-913.114	-914.368	-914.064	-913.109	-913.099	-914.359	-914.049	-912.847	-912.844	-914.101	-913.801	-913.226	-913.221	-914.472	-914.168
C26_001	-989.271	-989.267	-990.624	-990.295	-989.267	-989.262	-990.623	-990.293	-988.999	-988.998	-990.357	-990.033	-989.386	-989.386	-990.736	-990.414
C28_001	-1065.44	-1065.44	-1066.9	-1066.55	-1065.43	-1065.43	-1066.89	-1066.54	-1065.16	-1065.16	-1066.62	-1066.27	-1065.56	-1065.56	-1067.02	-1066.67
C28_002	-1065.45	-1065.45	-1066.91	-1066.56	-1065.45	-1065.47	-1066.91	-1066.58	-1065.18	-1065.19	-1066.64	-1066.3	-1065.57	-1065.58	-1067.03	-1066.69
C30_001	-1141.56	-1141.55	-1143.12	-1142.74	-1141.55	-1141.55	-1143.11	-1142.73	-1141.31	-1141.3	-1142.87	-1142.48	-1141.66	-1141.66	-1143.22	-1142.84
C30_002	-1141.63	-1141.64	-1143.2	-1142.82	-1141.6	-1141.6	-1143.16	-1142.79	-1141.35	-1141.35	-1142.91	-1142.54	-1141.73	-1141.74	-1143.29	-1142.92
C30_003	-1141.64	-1141.64	-1143.2	-1142.83	-1141.63	-1141.64	-1143.2	-1142.83	-1141.36	-1141.36	-1142.92	-1142.55	-1141.77	-1141.78	-1143.33	-1142.97
C32_001	-1217.76	-1217.77	-1219.43	-1219.03	-1217.76	-1217.77	-1219.43	-1219.03	-1217.51	-1217.51	-1219.18	-1218.78	-1217.87	-1217.88	-1219.53	-1219.15
C32_002	-1217.75	-1217.76	-1219.42	-1219.02	-1217.74	-1217.74	-1219.4	-1219	-1217.49	-1217.49	-1219.16	-1218.76	-1217.85	-1217.86	-1219.51	-1219.12
C32_003	-1217.73	-1217.73	-1219.4	-1219	-1217.72	-1217.72	-1219.39	-1218.99	-1217.47	-1217.47	-1219.14	-1218.74	-1217.84	-1217.85	-1219.5	-1219.11
C32_004	-1217.81	-1217.82	-1219.48	-1219.09	-1217.78	-1217.79	-1219.45	-1219.06	-1217.54	-1217.54	-1219.21	-1218.81	-1217.91	-1217.93	-1219.58	-1219.19
C32_005	-1217.73	-1217.74	-1219.4	-1219.01	-1217.69	-1217.7	-1219.36	-1218.96	-1217.45	-1217.46	-1219.12	-1218.72	-1217.82	-1217.83	-1219.49	-1219.1
C32_006	-1217.86	-1217.87	-1219.52	-1219.14	-1217.81	-1217.82	-1219.48	-1219.09	-1217.57	-1217.57	-1219.24	-1218.84	-1217.96	-1217.97	-1219.62	-1219.24
C34_001	-1293.86	-1293.87	-1295.63	-1295.21	-1293.85	-1293.86	-1295.62	-1295.2	-1293.6	-1293.6	-1295.37	-1294.96	-1293.98	-1293.99	-1295.74	-1295.33
C34_002	-1293.94	-1293.94	-1295.7	-1295.29	-1293.94	-1293.96	-1295.71	-1295.31	-1293.68	-1293.69	-1295.46	-1295.04	-1294.05	-1294.07	-1295.82	-1295.41
C34_003	-1293.94	-1293.95	-1295.71	-1295.3	-1293.93	-1293.95	-1295.7	-1295.3	-1293.68	-1293.69	-1295.46	-1295.04	-1294.05	-1294.07	-1295.82	-1295.41
C34_004	-1293.96	-1293.98	-1295.73	-1295.32	-1293.94	-1293.96	-1295.72	-1295.3	-1293.7	-1293.71	-1295.47	-1295.05	-1294.07	-1294.08	-1295.83	-1295.43
C34_005	-1293.99	-1294	-1295.76	-1295.34	-1293.98	-1293.99	-1295.75	-1295.34	-1293.73	-1293.74	-1295.5	-1295.09	-1294.09	-1294.11	-1295.86	-1295.46
C34_006	-1293.93	-1293.94	-1295.7	-1295.29	-1293.93	-1293.94	-1295.7	-1295.29	-1293.68	-1293.69	-1295.45	-1295.04	-1294.04	-1294.06	-1295.81	-1295.4
C36_001	-1370.03	-1370.04	-1371.9	-1371.47	-1370.02	-1370.03	-1371.89	-1371.46	-1369.77	-1369.78	-1371.65	-1371.21	-1370.15	-1370.16	-1372.02	-1371.58
C36_002	-1369.98	-1369.99	-1371.86	-1371.41	-1369.97	-1369.98	-1371.84	-1371.4	-1369.73	-1369.73	-1371.6	-1371.16	-1370.09	-1370.1	-1371.96	-1371.52
C36_003	-1370.06	-1370.07	-1371.93	-1371.5	-1370.06	-1370.07	-1371.93	-1371.5	-1369.8	-1369.82	-1371.68	-1371.25	-1370.18	-1370.2	-1372.05	-1371.62
C36_004	-1370.03	-1370.04	-1371.9	-1371.46	-1370.02	-1370.03	-1371.9	-1371.46	-1369.76	-1369.77	-1371.64	-1371.2	-1370.15	-1370.16	-1372.02	-1371.59
C36_005	-1369.99	-1370	-1371.87	-1371.42	-1370	-1370.01	-1371.87	-1371.44	-1369.74	-1369.74	-1371.62	-1371.17	-1370.12	-1370.13	-1371.99	-1371.55
C36_006	-1370.1	-1370.13	-1371.98	-1371.55	-1370.08	-1370.1	-1371.96	-1371.53	-1369.85	-1369.86	-1371.72	-1371.29	-1370.2	-1370.23	-1372.08	-1371.65
C36_007	-1370.09	-1370.11	-1371.97	-1371.54	-1370.09	-1370.11	-1371.96	-1371.54	-1369.83	-1369.85	-1371.71	-1371.28	-1370.21	-1370.23	-1372.08	-1371.66
C36_008	-1370.11	-1370.13	-1371.98	-1371.55	-1370.1	-1370.12	-1371.98	-1371.54	-1369.85	-1369.87	-1371.73	-1371.29	-1370.22	-1370.24	-1372.09	-1371.67
C36_009	-1370.14	-1370.16	-1372.02	-1371.59	-1370.13	-1370.15	-1372.01	-1371.58	-1369.89	-1369.9	-1371.77	-1371.33	-1370.25	-1370.27	-1372.12	-1371.7
C36_010	-1370.07	-1370.08	-1371.95	-1371.51	-1370.08	-1370.09	-1371.95	-1371.52	-1369.82	-1369.83	-1371.7	-1371.26	-1370.19	-1370.21	-1372.06	-1371.63
C36_011	-1370.13	-1370.15	-1372	-1371.57	-1370.13	-1370.15	-1372	-1371.58	-1369.87	-1369.89	-1371.75	-1371.32	-1370.25	-1370.27	-1372.12	-1371.69
C36_012	-1370.14	-1370.16	-1372.02	-1371.59	-1370.14	-1370.16	-1372.02	-1371.59	-1369.89	-1369.91	-1371.77	-1371.34	-1370.26	-1370.28	-1372.13	-1371.7
C36_013	-1370.08	-1370.09	-1371.96	-1371.51	-1370.08	-1370.09	-1371.95	-1371.52	-1369.82	-1369.82	-1371.69	-1371.24	-1370.21	-1370.22	-1372.08	-1371.64
C36_014	-1370.15	-1370.17	-1372.03	-1371.6	-1370.14	-1370.17	-1372.02	-1371.59	-1369.91	-1369.93	-1371.79	-1371.35	-1370.25	-1370.27	-1372.12	-1371.7
C36_015	-1370.15	-1370.17	-1372.03	-1371.59	-1370.14	-1370.17	-1372.02	-1371.59	-1369.89	-1369.9	-1371.77	-1371.33	-1370.26	-1370.28	-1372.13	-1371.7
C38_001	-1446.16	-1446.17	-1448.14	-1447.68	-1446.15	-1446.17	-1448.13	-1447.67	-1445.9	-1445.9	-1447.88	-1447.42	-1446.28	-1446.3	-1448.26	-1447.8
C38_002	-1446.12	-1446.13	-1448.1	-1447.63	-1446.11	-1446.11	-1448.09	-1447.62	-1445.86	-1445.86	-1447.84	-1447.36	-1446.24	-1446.25	-1448.21	-1447.75
C38_003	-1446.22	-1446.24	-1448.2	-1447.74	-1446.21	-1446.24	-1448.19	-1447.75	-1445.96	-1445.98	-1447.94	-1447.49	-1446.34	-1446.37	-1448.32	-1447.87
C38_004	-1446.2	-1446.22	-1448.18	-1447.72	-1446.18	-1446.2	-1448.16	-1447.7	-1445.94	-1445.95	-1447.92	-1447.45	-1446.31	-1446.33	-1448.29	-1447.83
C38_005	-1446.26	-1446.28	-1448.24	-1447.78	-1446.25	-1446.27	-1448.23	-1447.78	-1446	-1446.02	-1447.98	-1447.52	-1446.37	-1446.4	-1448.35	-1447.9
C38_006	-1446.23	-1446.25	-1448.21	-1447.75	-1446.21	-1446.23	-1448.19	-1447.74	-1445.97	-1445.99	-1447.95	-1447.49	-1446.34	-1446.36	-1448.32	-1447.86
C38_007	-1446.22	-1446.23	-1448.2	-1447.73	-1446.21	-1446.23	-1448.19	-1447.74	-1445.96	-1445.97	-1447.94	-1447.48	-1446.34	-1446.36	-1448.31	-1447.86
C38_008	-1446.26	-1446.28	-1448.24	-1447.79	-1446.25	-1446.27	-1448.23	-1447.78	-1446	-1446.02	-1447.98	-1447.52	-1446.38	-1446.41	-1448.36	-1447.91
C38_009	-1446.21	-1446.22	-1448.19	-1447.73	-1446.19	-1446.2	-1448.17	-1447.7	-1445.95	-1445.96	-1447.93	-1447.46	-1446.31	-1446.33	-1448.29	-1447.83
C38_010	-1446.28	-1446.31	-1448.26	-1447.81	-1446.27	-1446.3	-1448.26	-1447.81	-1446.01	-1446.04	-1448	-1447.54	-1446.4	-1446.43	-1448.38	-1447.94
C38_011	-1446.25	-1446.27	-1448.23	-1447.78	-1446.25	-1446.27	-1448.23	-1447.78	-1446	-1446.01	-1447.98	-1447.52	-1446.37	-1446.39	-1448.34	-1447.9
C38_012	-1446.2	-1446.21	-1448.18	-1447.72	-1446.19	-1446.21	-1448.17	-1447.71	-1445.94	-1445.94	-1447.92	-1447.45	-1446.32	-1446.34	-1448.3	-1447.84
C38_013	-1446.29	-1446.32	-1448.27	-1447.82	-1446.28	-1446.31	-1448.26	-1447.81	-1446.03	-1446.05	-1448.01	-1447.56	-1446.41	-1446.44	-1448.39	-1447.94
C38_014	-1446.28	-1446.3	-1448.26	-1447.81	-1446.27	-1446.3	-1448.25	-1447.8	-1446.02	-1446.04	-1448.01	-1447.55	-1446.39	-1446.42	-1448.37	-1447.93
C38_015	-1446.23	-1446.24	-1448.21	-1447.75	-1446.23	-1446.25	-1448.21	-1447.76	-1445.97	-1445.99	-1447.95	-1447.5	-1446.35	-1446.38	-1448.33	-1447.88
C38_016	-1446.28	-1446.3	-1448.26	-1447.8	-1446.28	-1446.31	-1448.26	-1447.82	-1446.02	-1446.04	-1448.01	-1447.55	-1446.4	-1446.43	-1448.38	-1447.94
C38_017	-1446.32	-1446.35	-1448.3	-1447.86	-1446.3	-1446.33	-1448.28	-1447.83	-1446.06	-1446.08	-1448.04	-1447.59	-1446.42	-1446.45	-1448.4	-1447.95
C40_001	-1522.18	-1522.19	-1524.26	-1523.77	-1522.18	-1522.19	-1524.26	-1523.77	-1521.94	-1521.94	-1524.02	-1523.53	-1522.3	-1522.31	-1524.37	-1523.89
C40_002	-1522.31	-1522.32	-1524.39	-1523.9	-1522.3	-1522.32	-1524.38	-1523.9	-1522.05	-1522.06	-1524.13	-1523.64	-1522.43	-1522.45	-1524.51	-1524.02
C40_003	-1522.24	-1522.25	-1524.32	-1523.83	-1522.24	-1522.26	-1524.32	-1523.84	-1522	-1522.01	-1524.08	-1523.59	-1522.36	-1522.37	-1524.43	-1523.95
C40_004	-1522.33	-1522.35	-1524.41	-1523.93	-1522.31	-1522.33	-1524.39	-1523.91	-1522.07	-1522.08	-1524.15	-1523.67	-1522.44	-1522.47	-1524.52	-1524.05
C40_005	-1522.36	-1522.38	-1524.44	-1523.96	-1522.35	-1522.37	-1524.43	-1523.95	-1522.09	-1522.11	-1524.18	-1523.69	-1522.48	-1522.51	-1524.56	-1524.09
C40_006	-1522.37	-1522.39	-1524.45	-1523.97	-1522.35	-1522.38	-1524.44	-1523.96	-1522.11	-1522.13	-1524.2	-1523.72	-1522.49	-1522.51	-1524.57	-1524.09
C40_007	-1522.32	-1522.33	-1524.4	-1523.91	-1522.31	-1522.33	-1524.39	-1523.91	-1522.06	-1522.07	-1524.14	-1523.66	-1522.44	-1522.46	-1524.52	-1524.04
C40_008	-1522.34	-1522.36	-1524.42	-1523.94	-1522.33	-1522.34	-1524.41	-1523.92	-1522.09	-1522.1	-1524.17	-1523.69	-1522.45	-1522.47	-1524.53	-1524.04
C40_009	-1522.4	-1522.43	-1524.48	-1524.01	-1522.4	-1522.42	-1524.48	-1524.01	-1522.14	-1522.16	-1524.23	-1523.75	-1522.53	-1522.56	-1524.61	-1524.14
C40_010	-1522.4	-1522.42	-1524.48	-1524.01	-1522.38	-1522.4	-1524.46	-1523.99	-1522.13	-1522.16	-1524.22	-1523.74	-1522.51	-1522.54	-1524.59	-1524.12
C40_011	-1522.3	-1522.32	-1524.38	-1523.9	-1522.29	-1522.31	-1524.37	-1523.89	-1522.05	-1522.06	-1524.13	-1523.65	-1522.41	-1522.43	-1524.49	-1524.01
C40_012	-1522.4	-1522.42	-1524.48	-1524	-1522.38	-1522.41	-1524.46	-1523.99	-1522.14	-1522.16	-1524.22	-1523.74	-1522.51	-1522.53	-1524.59	-1524.12
C40_013	-1522.4	-1522.42	-1524.48	-1524	-1522.38	-1522.4	-1524.46	-1523.99	-1522.14	-1522.16	-1524.22	-1523.74	-1522.51	-1522.54	-1524.59	-1524.12
C40_014	-1522.42	-1522.45	-1524.51	-1524.03	-1522.42	-1522.45	-1524.51	-1524.04	-1522.16	-1522.19	-1524.25	-1523.78	-1522.55	-1522.58	-1524.63	-1524.16
C40_015	-1522.41	-1522.43	-1524.49	-1524.02	-1522.4	-1522.43	-1524.48	-1524.01	-1522.15	-1522.17	-1524.24	-1523.76	-1522.53	-1522.55	-1524.61	-1524.14
C40_016	-1522.39	-1522.42	-1524.48	-1524	-1522.38	-1522.41	-1524.47	-1523.99	-1522.14	-1522.15	-1524.22	-1523.74	-1522.51	-1522.53	-1524.59	-1524.11
C40_017	-1522.4	-1522.43	-1524.49	-1524.01	-1522.39	-1522.41	-1524.47	-1524	-1522.14	-1522.16	-1524.23	-1523.75	-1522.52	-1522.55	-1524.6	-1524.13
C40_018	-1522.35	-1522.37	-1524.44	-1523.95	-1522.33	-1522.35	-1524.42	-1523.93	-1522.09	-1522.1	-1524.18	-1523.69	-1522.47	-1522.49	-1524.54	-1524.07
C40_019	-1522.39	-1522.41	-1524.47	-1523.99	-1522.39	-1522.42	-1524.47	-1524	-1522.14	-1522.16	-1524.22	-1523.75	-1522.51	-1522.54	-1524.59	-1524.12
C40_020	-1522.4	-1522.41	-1524.48	-1524	-1522.4	-1522.42	-1524.48	-1524.01	-1522.14	-1522.16	-1524.23	-1523.75	-1522.52	-1522.55	-1524.6	-1524.13
C40_021	-1522.43	-1522.45	-1524.51	-1524.03	-1522.41	-1522.45	-1524.5	-1524.03	-1522.16	-1522.18	-1524.25	-1523.77	-1522.55	-1522.58	-1524.63	-1524.16
C40_022	-1522.42	-1522.45	-1524.51	-1524.03	-1522.41	-1522.43	-1524.49	-1524.02	-1522.16	-1522.18	-1524.25	-1523.77	-1522.54	-1522.57	-1524.62	-1524.15
C40_023	-1522.37	-1522.39	-1524.45	-1523.97	-1522.36	-1522.38	-1524.44	-1523.96	-1522.1	-1522.11	-1524.18	-1523.7	-1522.49	-1522.52	-1524.57	-1524.1
C40_024	-1522.45	-1522.48	-1524.53	-1524.06	-1522.44	-1522.48	-1524.53	-1524.07	-1522.19	-1522.22	-1524.28	-1523.81	-1522.57	-1522.61	-1524.65	-1524.19
C40_025	-1522.42	-1522.45	-1524.51	-1524.03	-1522.4	-1522.43	-1524.49	-1524.02	-1522.16	-1522.18	-1524.25	-1523.77	-1522.54	-1522.57	-1524.62	-1524.15
C40_026	-1522.45	-1522.48	-1524.54	-1524.06	-1522.44	-1522.47	-1524.52	-1524.06	-1522.19	-1522.22	-1524.27	-1523.8	-1522.57	-1522.6	-1524.65	-1524.18
C40_027	-1522.42	-1522.45	-1524.51	-1524.03	-1522.41	-1522.44	-1524.49	-1524.02	-1522.16	-1522.18	-1524.25	-1523.77	-1522.54	-1522.57	-1524.62	-1524.15
C40_028	-1522.41	-1522.44	-1524.49	-1524.02	-1522.39	-1522.42	-1524.48	-1524	-1522.14	-1522.16	-1524.23	-1523.75	-1522.53	-1522.56	-1524.61	-1524.15
C40_029	-1522.46	-1522.48	-1524.54	-1524.07	-1522.44	-1522.48	-1524.53	-1524.06	-1522.19	-1522.21	-1524.27	-1523.8	-1522.58	-1522.61	-1524.66	-1524.19
C40_030	-1522.42	-1522.45	-1524.51	-1524.03	-1522.43	-1522.46	-1524.51	-1524.05	-1522.17	-1522.2	-1524.26	-1523.78	-1522.55	-1522.58	-1524.63	-1524.16
C40_031	-1522.46	-1522.5	-1524.55	-1524.08	-1522.45	-1522.48	-1524.53	-1524.07	-1522.2	-1522.22	-1524.28	-1523.81	-1522.58	-1522.62	-1524.66	-1524.2
C40_032	-1522.35	-1522.37	-1524.43	-1523.95	-1522.35	-1522.37	-1524.43	-1523.95	-1522.09	-1522.11	-1524.18	-1523.69	-1522.48	-1522.5	-1524.56	-1524.08
C40_033	-1522.34	-1522.36	-1524.42	-1523.94	-1522.33	-1522.35	-1524.42	-1523.93	-1522.07	-1522.08	-1524.15	-1523.66	-1522.47	-1522.5	-1524.55	-1524.08
C40_034	-1522.41	-1522.44	-1524.49	-1524.02	-1522.4	-1522.42	-1524.48	-1524.01	-1522.15	-1522.17	-1524.23	-1523.76	-1522.53	-1522.56	-1524.61	-1524.14
C40_035	-1522.41	-1522.43	-1524.49	-1524.02	-1522.41	-1522.44	-1524.5	-1524.03	-1522.15	-1522.18	-1524.24	-1523.77	-1522.54	-1522.56	-1524.62	-1524.14
C40_036	-1522.43	-1522.46	-1524.51	-1524.04	-1522.43	-1522.46	-1524.51	-1524.04	-1522.17	-1522.2	-1524.26	-1523.79	-1522.55	-1522.58	-1524.63	-1524.16
C40_037	-1522.44	-1522.48	-1524.53	-1524.06	-1522.41	-1522.44	-1524.5	-1524.02	-1522.17	-1522.2	-1524.26	-1523.79	-1522.55	-1522.59	-1524.63	-1524.17
C40_038	-1522.49	-1522.53	-1524.57	-1524.11	-1522.46	-1522.49	-1524.55	-1524.08	-1522.22	-1522.25	-1524.31	-1523.84	-1522.59	-1522.63	-1524.68	-1524.21
C40_039	-1522.47	-1522.51	-1524.56	-1524.09	-1522.43	-1522.46	-1524.52	-1524.04	-1522.2	-1522.23	-1524.29	-1523.81	-1522.58	-1522.61	-1524.66	-1524.19
C40_040	-1522.43	-1522.46	-1524.52	-1524.05	-1522.42	-1522.45	-1524.5	-1524.03	-1522.17	-1522.19	-1524.26	-1523.78	-1522.55	-1522.58	-1524.63	-1524.16
C42_001	-1598.46	-1598.48	-1600.64	-1600.14	-1598.44	-1598.46	-1600.63	-1600.12	-1598.2	-1598.21	-1600.39	-1599.88	-1598.57	-1598.59	-1600.75	-1600.25
C42_002	-1598.5	-1598.51	-1600.68	-1600.17	-1598.48	-1598.51	-1600.67	-1600.17	-1598.24	-1598.26	-1600.43	-1599.92	-1598.61	-1598.64	-1600.8	-1600.3
C42_003	-1598.5	-1598.53	-1600.69	-1600.19	-1598.49	-1598.52	-1600.68	-1600.18	-1598.25	-1598.27	-1600.44	-1599.93	-1598.62	-1598.65	-1600.8	-1600.31
C42_004	-1598.51	-1598.53	-1600.7	-1600.19	-1598.5	-1598.52	-1600.68	-1600.18	-1598.25	-1598.27	-1600.44	-1599.94	-1598.63	-1598.65	-1600.81	-1600.31
C42_005	-1598.48	-1598.5	-1600.67	-1600.16	-1598.46	-1598.48	-1600.64	-1600.14	-1598.22	-1598.24	-1600.41	-1599.9	-1598.59	-1598.61	-1600.77	-1600.27
C42_006	-1598.5	-1598.52	-1600.69	-1600.18	-1598.51	-1598.55	-1600.7	-1600.21	-1598.25	-1598.27	-1600.44	-1599.94	-1598.64	-1598.67	-1600.82	-1600.32
C42_007	-1598.46	-1598.48	-1600.65	-1600.14	-1598.47	-1598.49	-1600.66	-1600.15	-1598.23	-1598.25	-1600.42	-1599.91	-1598.58	-1598.6	-1600.76	-1600.27
C42_008	-1598.52	-1598.55	-1600.71	-1600.21	-1598.51	-1598.54	-1600.7	-1600.2	-1598.27	-1598.29	-1600.46	-1599.95	-1598.64	-1598.67	-1600.82	-1600.33
C42_009	-1598.55	-1598.58	-1600.74	-1600.24	-1598.54	-1598.57	-1600.73	-1600.23	-1598.29	-1598.31	-1600.48	-1599.98	-1598.68	-1598.71	-1600.86	-1600.37
C42_010	-1598.54	-1598.57	-1600.73	-1600.23	-1598.52	-1598.55	-1600.71	-1600.21	-1598.28	-1598.3	-1600.47	-1599.97	-1598.65	-1598.68	-1600.84	-1600.34
C42_011	-1598.54	-1598.56	-1600.73	-1600.23	-1598.52	-1598.54	-1600.7	-1600.2	-1598.28	-1598.3	-1600.47	-1599.96	-1598.65	-1598.68	-1600.83	-1600.34
C42_012	-1598.57	-1598.6	-1600.76	-1600.26	-1598.56	-1598.59	-1600.75	-1600.25	-1598.31	-1598.34	-1600.5	-1600	-1598.69	-1598.72	-1600.88	-1600.38
C42_013	-1598.56	-1598.59	-1600.75	-1600.26	-1598.55	-1598.58	-1600.74	-1600.24	-1598.31	-1598.33	-1600.5	-1600	-1598.68	-1598.72	-1600.87	-1600.37
C42_014	-1598.59	-1598.62	-1600.78	-1600.28	-1598.58	-1598.61	-1600.77	-1600.27	-1598.33	-1598.36	-1600.52	-1600.02	-1598.71	-1598.74	-1600.89	-1600.4
C42_015	-1598.52	-1598.54	-1600.71	-1600.2	-1598.51	-1598.53	-1600.69	-1600.19	-1598.26	-1598.28	-1600.45	-1599.95	-1598.63	-1598.66	-1600.82	-1600.32
C42_016	-1598.57	-1598.6	-1600.76	-1600.26	-1598.56	-1598.59	-1600.75	-1600.25	-1598.31	-1598.34	-1600.5	-1600	-1598.69	-1598.72	-1600.88	-1600.38
C42_017	-1598.57	-1598.59	-1600.75	-1600.26	-1598.55	-1598.58	-1600.74	-1600.25	-1598.31	-1598.33	-1600.5	-1600	-1598.68	-1598.71	-1600.87	-1600.37
C42_018	-1598.53	-1598.55	-1600.72	-1600.21	-1598.52	-1598.55	-1600.71	-1600.21	-1598.28	-1598.3	-1600.47	-1599.96	-1598.65	-1598.67	-1600.83	-1600.33
C42_019	-1598.6	-1598.63	-1600.79	-1600.29	-1598.57	-1598.6	-1600.76	-1600.27	-1598.33	-1598.36	-1600.52	-1600.02	-1598.71	-1598.74	-1600.89	-1600.4
C42_020	-1598.56	-1598.58	-1600.74	-1600.24	-1598.55	-1598.58	-1600.74	-1600.24	-1598.3	-1598.33	-1600.49	-1599.99	-1598.67	-1598.7	-1600.86	-1600.36
C42_021	-1598.6	-1598.63	-1600.79	-1600.3	-1598.58	-1598.61	-1600.76	-1600.27	-1598.34	-1598.36	-1600.53	-1600.03	-1598.71	-1598.75	-1600.9	-1600.41
C42_022	-1598.51	-1598.54	-1600.7	-1600.2	-1598.52	-1598.55	-1600.71	-1600.21	-1598.25	-1598.27	-1600.44	-1599.94	-1598.65	-1598.68	-1600.84	-1600.34
C42_023	-1598.56	-1598.58	-1600.75	-1600.25	-1598.54	-1598.57	-1600.73	-1600.23	-1598.3	-1598.32	-1600.49	-1599.98	-1598.67	-1598.7	-1600.86	-1600.36
C42_024	-1598.59	-1598.61	-1600.77	-1600.28	-1598.58	-1598.61	-1600.77	-1600.27	-1598.32	-1598.35	-1600.51	-1600.01	-1598.71	-1598.75	-1600.9	-1600.41
C42_025	-1598.59	-1598.62	-1600.77	-1600.28	-1598.58	-1598.62	-1600.77	-1600.29	-1598.33	-1598.36	-1600.52	-1600.03	-1598.71	-1598.75	-1600.9	-1600.41
C42_026	-1598.57	-1598.6	-1600.76	-1600.26	-1598.55	-1598.59	-1600.74	-1600.25	-1598.31	-1598.33	-1600.5	-1600	-1598.69	-1598.72	-1600.87	-1600.38
C42_027	-1598.58	-1598.6	-1600.76	-1600.26	-1598.57	-1598.6	-1600.75	-1600.26	-1598.32	-1598.34	-1600.51	-1600.01	-1598.69	-1598.73	-1600.88	-1600.39
C42_028	-1598.53	-1598.56	-1600.72	-1600.22	-1598.54	-1598.57	-1600.73	-1600.23	-1598.28	-1598.31	-1600.47	-1599.97	-1598.66	-1598.69	-1600.84	-1600.35
C42_029	-1598.58	-1598.61	-1600.77	-1600.27	-1598.57	-1598.6	-1600.76	-1600.26	-1598.32	-1598.35	-1600.51	-1600.01	-1598.7	-1598.73	-1600.88	-1600.39
C42_030	-1598.56	-1598.58	-1600.75	-1600.25	-1598.54	-1598.57	-1600.73	-1600.23	-1598.3	-1598.32	-1600.49	-1599.98	-1598.67	-1598.7	-1600.86	-1600.36
C42_031	-1598.59	-1598.62	-1600.78	-1600.29	-1598.59	-1598.62	-1600.78	-1600.29	-1598.33	-1598.36	-1600.52	-1600.03	-1598.72	-1598.75	-1600.9	-1600.41
C42_032	-1598.62	-1598.65	-1600.81	-1600.32	-1598.6	-1598.64	-1600.79	-1600.31	-1598.36	-1598.39	-1600.55	-1600.05	-1598.74	-1598.78	-1600.92	-1600.44
C42_033	-1598.63	-1598.66	-1600.81	-1600.32	-1598.61	-1598.64	-1600.8	-1600.31	-1598.36	-1598.39	-1600.55	-1600.06	-1598.74	-1598.78	-1600.93	-1600.44
C42_034	-1598.59	-1598.62	-1600.78	-1600.28	-1598.57	-1598.6	-1600.76	-1600.27	-1598.33	-1598.35	-1600.52	-1600.02	-1598.71	-1598.74	-1600.89	-1600.4
C42_035	-1598.61	-1598.65	-1600.8	-1600.31	-1598.61	-1598.65	-1600.8	-1600.31	-1598.35	-1598.38	-1600.54	-1600.05	-1598.74	-1598.78	-1600.93	-1600.44
C42_036	-1598.58	-1598.62	-1600.77	-1600.28	-1598.57	-1598.61	-1600.76	-1600.27	-1598.32	-1598.35	-1600.51	-1600.02	-1598.7	-1598.74	-1600.89	-1600.4
C42_037	-1598.53	-1598.56	-1600.72	-1600.22	-1598.52	-1598.55	-1600.71	-1600.21	-1598.27	-1598.29	-1600.46	-1599.95	-1598.65	-1598.68	-1600.84	-1600.34
C42_038	-1598.5	-1598.52	-1600.68	-1600.18	-1598.47	-1598.5	-1600.66	-1600.16	-1598.23	-1598.25	-1600.42	-1599.92	-1598.61	-1598.64	-1600.79	-1600.29
C42_039	-1598.62	-1598.65	-1600.81	-1600.32	-1598.6	-1598.64	-1600.79	-1600.31	-1598.35	-1598.39	-1600.55	-1600.05	-1598.74	-1598.77	-1600.92	-1600.44
C42_040	-1598.58	-1598.62	-1600.77	-1600.28	-1598.57	-1598.6	-1600.76	-1600.26	-1598.32	-1598.35	-1600.51	-1600.01	-1598.7	-1598.74	-1600.89	-1600.4
C42_041	-1598.6	-1598.63	-1600.79	-1600.29	-1598.6	-1598.63	-1600.79	-1600.3	-1598.34	-1598.37	-1600.53	-1600.04	-1598.73	-1598.76	-1600.91	-1600.42
C42_042	-1598.54	-1598.57	-1600.73	-1600.24	-1598.54	-1598.58	-1600.73	-1600.24	-1598.29	-1598.31	-1600.48	-1599.98	-1598.67	-1598.71	-1600.86	-1600.37
C42_043	-1598.58	-1598.61	-1600.76	-1600.27	-1598.55	-1598.59	-1600.74	-1600.25	-1598.3	-1598.33	-1600.5	-1600	-1598.7	-1598.73	-1600.88	-1600.39
C42_044	-1598.61	-1598.64	-1600.8	-1600.3	-1598.6	-1598.64	-1600.79	-1600.3	-1598.35	-1598.38	-1600.54	-1600.04	-1598.73	-1598.77	-1600.91	-1600.43
C42_045	-1598.66	-1598.7	-1600.85	-1600.36	-1598.63	-1598.66	-1600.82	-1600.33	-1598.39	-1598.42	-1600.58	-1600.09	-1598.77	-1598.81	-1600.96	-1600.47
C44_001	-1674.57	-1674.59	-1676.86	-1676.33	-1674.57	-1674.59	-1676.85	-1676.33	-1674.32	-1674.34	-1676.61	-1676.08	-1674.69	-1674.72	-1676.98	-1676.46
C44_002	-1674.54	-1674.56	-1676.83	-1676.3	-1674.52	-1674.53	-1676.81	-1676.27	-1674.29	-1674.3	-1676.58	-1676.04	-1674.65	-1674.67	-1676.94	-1676.41
C44_003	-1674.51	-1674.51	-1676.8	-1676.25	-1674.51	-1674.52	-1676.79	-1676.26	-1674.26	-1674.26	-1676.55	-1676.01	-1674.63	-1674.64	-1676.91	-1676.38
C44_004	-1674.62	-1674.63	-1676.91	-1676.37	-1674.62	-1674.65	-1676.91	-1676.39	-1674.37	-1674.39	-1676.66	-1676.13	-1674.75	-1674.77	-1677.03	-1676.51
C44_005	-1674.65	-1674.67	-1676.94	-1676.41	-1674.64	-1674.67	-1676.93	-1676.41	-1674.4	-1674.42	-1676.69	-1676.16	-1674.77	-1674.79	-1677.05	-1676.53
C44_006	-1674.65	-1674.67	-1676.94	-1676.41	-1674.63	-1674.65	-1676.92	-1676.39	-1674.39	-1674.41	-1676.68	-1676.15	-1674.76	-1674.79	-1677.04	-1676.52
C44_007	-1674.66	-1674.68	-1676.95	-1676.42	-1674.64	-1674.67	-1676.94	-1676.41	-1674.4	-1674.43	-1676.7	-1676.17	-1674.77	-1674.8	-1677.06	-1676.54
C44_008	-1674.68	-1674.7	-1676.97	-1676.44	-1674.67	-1674.69	-1676.96	-1676.44	-1674.42	-1674.45	-1676.72	-1676.19	-1674.79	-1674.82	-1677.08	-1676.56
C44_009	-1674.58	-1674.6	-1676.87	-1676.34	-1674.58	-1674.6	-1676.87	-1676.34	-1674.33	-1674.35	-1676.63	-1676.09	-1674.7	-1674.73	-1676.99	-1676.47
C44_010	-1674.65	-1674.68	-1676.94	-1676.42	-1674.64	-1674.66	-1676.93	-1676.4	-1674.39	-1674.41	-1676.69	-1676.16	-1674.77	-1674.8	-1677.06	-1676.54
C44_011	-1674.62	-1674.64	-1676.91	-1676.38	-1674.61	-1674.63	-1676.89	-1676.37	-1674.36	-1674.38	-1676.65	-1676.12	-1674.74	-1674.77	-1677.02	-1676.51
C44_012	-1674.63	-1674.66	-1676.92	-1676.4	-1674.61	-1674.64	-1676.9	-1676.38	-1674.37	-1674.39	-1676.66	-1676.14	-1674.74	-1674.77	-1677.03	-1676.51
C44_013	-1674.67	-1674.7	-1676.96	-1676.44	-1674.64	-1674.67	-1676.93	-1676.41	-1674.41	-1674.43	-1676.71	-1676.18	-1674.77	-1674.8	-1677.06	-1676.54
C44_014	-1674.62	-1674.64	-1676.91	-1676.38	-1674.62	-1674.64	-1676.91	-1676.38	-1674.37	-1674.39	-1676.67	-1676.14	-1674.74	-1674.76	-1677.02	-1676.5
C44_015	-1674.69	-1674.72	-1676.99	-1676.46	-1674.68	-1674.71	-1676.97	-1676.46	-1674.44	-1674.46	-1676.73	-1676.21	-1674.81	-1674.85	-1677.1	-1676.59
C44_016	-1674.71	-1674.74	-1677	-1676.49	-1674.67	-1674.7	-1676.97	-1676.45	-1674.44	-1674.47	-1676.74	-1676.21	-1674.82	-1674.85	-1677.1	-1676.59
C44_017	-1674.63	-1674.65	-1676.92	-1676.39	-1674.63	-1674.65	-1676.92	-1676.4	-1674.38	-1674.4	-1676.67	-1676.14	-1674.75	-1674.78	-1677.04	-1676.52
C44_018	-1674.71	-1674.74	-1677	-1676.48	-1674.68	-1674.71	-1676.97	-1676.45	-1674.45	-1674.48	-1676.74	-1676.22	-1674.81	-1674.85	-1677.1	-1676.59
C44_019	-1674.71	-1674.75	-1677	-1676.49	-1674.69	-1674.72	-1676.98	-1676.47	-1674.46	-1674.48	-1676.75	-1676.23	-1674.82	-1674.86	-1677.11	-1676.6
C44_020	-1674.68	-1674.71	-1676.97	-1676.45	-1674.68	-1674.71	-1676.97	-1676.45	-1674.43	-1674.46	-1676.73	-1676.2	-1674.79	-1674.83	-1677.08	-1676.57
C44_021	-1674.67	-1674.7	-1676.96	-1676.44	-1674.66	-1674.69	-1676.95	-1676.43	-1674.41	-1674.44	-1676.71	-1676.18	-1674.78	-1674.82	-1677.07	-1676.56
C44_022	-1674.73	-1674.77	-1677.03	-1676.51	-1674.72	-1674.75	-1677.01	-1676.49	-1674.48	-1674.51	-1676.77	-1676.25	-1674.85	-1674.88	-1677.13	-1676.62
C44_023	-1674.71	-1674.74	-1677	-1676.48	-1674.7	-1674.73	-1676.99	-1676.47	-1674.45	-1674.48	-1676.75	-1676.22	-1674.83	-1674.87	-1677.12	-1676.61
C44_024	-1674.69	-1674.72	-1676.98	-1676.46	-1674.68	-1674.71	-1676.97	-1676.45	-1674.43	-1674.46	-1676.73	-1676.2	-1674.81	-1674.84	-1677.1	-1676.58
C44_025	-1674.74	-1674.77	-1677.03	-1676.52	-1674.72	-1674.75	-1677.01	-1676.49	-1674.48	-1674.51	-1676.78	-1676.25	-1674.85	-1674.89	-1677.14	-1676.63
C44_026	-1674.69	-1674.72	-1676.98	-1676.46	-1674.69	-1674.72	-1676.98	-1676.47	-1674.44	-1674.47	-1676.74	-1676.21	-1674.81	-1674.85	-1677.1	-1676.59
C44_027	-1674.67	-1674.7	-1676.96	-1676.44	-1674.68	-1674.7	-1676.97	-1676.44	-1674.43	-1674.46	-1676.72	-1676.2	-1674.79	-1674.83	-1677.08	-1676.57
C44_028	-1674.72	-1674.76	-1677.02	-1676.5	-1674.71	-1674.75	-1677	-1676.49	-1674.47	-1674.49	-1676.76	-1676.24	-1674.84	-1674.88	-1677.13	-1676.61
C44_029	-1674.74	-1674.78	-1677.03	-1676.52	-1674.72	-1674.76	-1677.02	-1676.5	-1674.48	-1674.51	-1676.78	-1676.25	-1674.86	-1674.89	-1677.15	-1676.63
C44_030	-1674.74	-1674.77	-1677.03	-1676.51	-1674.72	-1674.75	-1677.01	-1676.49	-1674.47	-1674.5	-1676.77	-1676.25	-1674.85	-1674.89	-1677.14	-1676.63
C44_031	-1674.7	-1674.73	-1676.99	-1676.47	-1674.69	-1674.72	-1676.98	-1676.46	-1674.44	-1674.47	-1676.74	-1676.21	-1674.82	-1674.85	-1677.11	-1676.59
C44_032	-1674.78	-1674.81	-1677.07	-1676.56	-1674.74	-1674.78	-1677.04	-1676.52	-1674.51	-1674.54	-1676.8	-1676.28	-1674.89	-1674.93	-1677.17	-1676.67
C44_033	-1674.7	-1674.73	-1676.99	-1676.47	-1674.69	-1674.73	-1676.99	-1676.47	-1674.45	-1674.47	-1676.74	-1676.22	-1674.82	-1674.85	-1677.11	-1676.59
C44_034	-1674.66	-1674.69	-1676.95	-1676.43	-1674.65	-1674.67	-1676.94	-1676.41	-1674.4	-1674.43	-1676.7	-1676.17	-1674.77	-1674.8	-1677.06	-1676.54
C44_035	-1674.59	-1674.6	-1676.87	-1676.34	-1674.56	-1674.58	-1676.85	-1676.32	-1674.33	-1674.34	-1676.62	-1676.09	-1674.69	-1674.72	-1676.98	-1676.45
C44_036	-1674.73	-1674.77	-1677.02	-1676.51	-1674.72	-1674.75	-1677.01	-1676.49	-1674.47	-1674.5	-1676.77	-1676.25	-1674.85	-1674.88	-1677.14	-1676.62
C44_037	-1674.71	-1674.74	-1677	-1676.48	-1674.69	-1674.71	-1676.98	-1676.46	-1674.44	-1674.46	-1676.74	-1676.2	-1674.83	-1674.87	-1677.12	-1676.61
C44_038	-1674.71	-1674.74	-1677	-1676.48	-1674.69	-1674.72	-1676.98	-1676.46	-1674.44	-1674.46	-1676.74	-1676.21	-1674.83	-1674.86	-1677.12	-1676.6
C44_039	-1674.77	-1674.81	-1677.07	-1676.55	-1674.74	-1674.78	-1677.03	-1676.52	-1674.5	-1674.53	-1676.79	-1676.27	-1674.89	-1674.93	-1677.18	-1676.67
C44_040	-1674.75	-1674.78	-1677.04	-1676.52	-1674.72	-1674.76	-1677.02	-1676.5	-1674.48	-1674.51	-1676.78	-1676.25	-1674.86	-1674.9	-1677.15	-1676.64
C44_041	-1674.69	-1674.72	-1676.98	-1676.46	-1674.68	-1674.71	-1676.97	-1676.46	-1674.43	-1674.46	-1676.73	-1676.21	-1674.81	-1674.84	-1677.1	-1676.58
C44_042	-1674.73	-1674.75	-1677.02	-1676.49	-1674.71	-1674.75	-1677.01	-1676.49	-1674.47	-1674.49	-1676.76	-1676.24	-1674.85	-1674.88	-1677.13	-1676.62
C44_043	-1674.69	-1674.72	-1676.98	-1676.46	-1674.69	-1674.72	-1676.98	-1676.46	-1674.44	-1674.46	-1676.74	-1676.21	-1674.81	-1674.84	-1677.1	-1676.58
C44_044	-1674.7	-1674.73	-1676.99	-1676.47	-1674.7	-1674.73	-1676.99	-1676.47	-1674.45	-1674.48	-1676.75	-1676.22	-1674.82	-1674.85	-1677.11	-1676.59
C44_045	-1674.7	-1674.72	-1676.99	-1676.47	-1674.7	-1674.73	-1676.99	-1676.47	-1674.45	-1674.47	-1676.74	-1676.22	-1674.82	-1674.86	-1677.11	-1676.59
C44_046	-1674.67	-1674.69	-1676.96	-1676.43	-1674.67	-1674.7	-1676.96	-1676.45	-1674.42	-1674.44	-1676.71	-1676.19	-1674.79	-1674.82	-1677.08	-1676.56
C44_047	-1674.77	-1674.8	-1677.06	-1676.54	-1674.75	-1674.79	-1677.05	-1676.53	-1674.5	-1674.53	-1676.8	-1676.28	-1674.89	-1674.93	-1677.17	-1676.67
C44_048	-1674.68	-1674.71	-1676.97	-1676.45	-1674.69	-1674.72	-1676.98	-1676.46	-1674.43	-1674.46	-1676.72	-1676.2	-1674.82	-1674.85	-1677.11	-1676.59
C44_049	-1674.74	-1674.77	-1677.03	-1676.51	-1674.74	-1674.77	-1677.03	-1676.51	-1674.48	-1674.51	-1676.77	-1676.25	-1674.87	-1674.91	-1677.15	-1676.65
C44_050	-1674.73	-1674.76	-1677.02	-1676.5	-1674.71	-1674.75	-1677	-1676.49	-1674.47	-1674.49	-1676.76	-1676.24	-1674.84	-1674.88	-1677.13	-1676.62
C44_051	-1674.75	-1674.79	-1677.05	-1676.53	-1674.74	-1674.78	-1677.03	-1676.52	-1674.49	-1674.53	-1676.79	-1676.27	-1674.87	-1674.91	-1677.16	-1676.65
C44_052	-1674.8	-1674.85	-1677.1	-1676.59	-1674.78	-1674.82	-1677.08	-1676.57	-1674.53	-1674.57	-1676.83	-1676.32	-1674.92	-1674.97	-1677.22	-1676.71
C44_053	-1674.69	-1674.72	-1676.98	-1676.47	-1674.68	-1674.71	-1676.97	-1676.45	-1674.43	-1674.46	-1676.72	-1676.2	-1674.81	-1674.85	-1677.1	-1676.59
C44_054	-1674.75	-1674.79	-1677.04	-1676.53	-1674.74	-1674.77	-1677.03	-1676.51	-1674.48	-1674.52	-1676.78	-1676.26	-1674.87	-1674.92	-1677.16	-1676.66
C44_055	-1674.81	-1674.85	-1677.11	-1676.59	-1674.77	-1674.82	-1677.07	-1676.56	-1674.53	-1674.57	-1676.83	-1676.31	-1674.92	-1674.97	-1677.21	-1676.71
C44_056	-1674.77	-1674.81	-1677.06	-1676.55	-1674.75	-1674.79	-1677.04	-1676.53	-1674.5	-1674.54	-1676.8	-1676.28	-1674.89	-1674.93	-1677.18	-1676.67
C44_057	-1674.75	-1674.79	-1677.04	-1676.53	-1674.75	-1674.79	-1677.04	-1676.53	-1674.49	-1674.52	-1676.79	-1676.27	-1674.88	-1674.92	-1677.17	-1676.66
C44_058	-1674.7	-1674.73	-1676.99	-1676.47	-1674.7	-1674.73	-1676.99	-1676.47	-1674.45	-1674.47	-1676.74	-1676.22	-1674.82	-1674.86	-1677.11	-1676.6
C44_059	-1674.77	-1674.81	-1677.06	-1676.55	-1674.75	-1674.79	-1677.05	-1676.54	-1674.5	-1674.54	-1676.8	-1676.28	-1674.89	-1674.93	-1677.18	-1676.67
C44_060	-1674.75	-1674.78	-1677.04	-1676.52	-1674.73	-1674.76	-1677.02	-1676.51	-1674.48	-1674.51	-1676.78	-1676.25	-1674.87	-1674.91	-1677.16	-1676.65
C44_061	-1674.72	-1674.76	-1677.02	-1676.5	-1674.72	-1674.76	-1677.02	-1676.5	-1674.47	-1674.5	-1676.77	-1676.24	-1674.85	-1674.89	-1677.14	-1676.63
C44_062	-1674.74	-1674.77	-1677.03	-1676.52	-1674.73	-1674.76	-1677.02	-1676.51	-1674.48	-1674.51	-1676.78	-1676.26	-1674.86	-1674.9	-1677.15	-1676.64
C44_063	-1674.73	-1674.77	-1677.02	-1676.51	-1674.73	-1674.76	-1677.02	-1676.5	-1674.47	-1674.5	-1676.77	-1676.25	-1674.86	-1674.9	-1677.15	-1676.64
C44_064	-1674.73	-1674.76	-1677.02	-1676.5	-1674.72	-1674.75	-1677.01	-1676.5	-1674.47	-1674.5	-1676.77	-1676.25	-1674.85	-1674.89	-1677.14	-1676.62
C44_065	-1674.72	-1674.75	-1677.01	-1676.49	-1674.71	-1674.74	-1677	-1676.49	-1674.46	-1674.49	-1676.76	-1676.24	-1674.84	-1674.88	-1677.13	-1676.62
C44_066	-1674.61	-1674.63	-1676.9	-1676.37	-1674.61	-1674.64	-1676.9	-1676.38	-1674.35	-1674.38	-1676.65	-1676.12	-1674.74	-1674.77	-1677.02	-1676.51
C44_067	-1674.74	-1674.78	-1677.04	-1676.52	-1674.74	-1674.78	-1677.04	-1676.53	-1674.49	-1674.53	-1676.79	-1676.27	-1674.87	-1674.91	-1677.16	-1676.65
C44_068	-1674.78	-1674.82	-1677.07	-1676.56	-1674.76	-1674.8	-1677.05	-1676.54	-1674.51	-1674.54	-1676.81	-1676.29	-1674.9	-1674.94	-1677.19	-1676.68
C44_069	-1674.81	-1674.85	-1677.1	-1676.59	-1674.79	-1674.83	-1677.08	-1676.57	-1674.54	-1674.57	-1676.83	-1676.32	-1674.93	-1674.97	-1677.22	-1676.71
C44_070	-1674.76	-1674.79	-1677.05	-1676.54	-1674.75	-1674.79	-1677.04	-1676.53	-1674.5	-1674.53	-1676.8	-1676.28	-1674.88	-1674.92	-1677.17	-1676.66
C44_071	-1674.71	-1674.74	-1677	-1676.49	-1674.7	-1674.74	-1676.99	-1676.48	-1674.45	-1674.48	-1676.74	-1676.22	-1674.83	-1674.87	-1677.12	-1676.61
C44_072	-1674.82	-1674.86	-1677.11	-1676.6	-1674.78	-1674.82	-1677.07	-1676.56	-1674.54	-1674.58	-1676.84	-1676.32	-1674.93	-1674.97	-1677.22	-1676.71
C44_073	-1674.73	-1674.75	-1677.02	-1676.5	-1674.69	-1674.72	-1676.99	-1676.47	-1674.46	-1674.48	-1676.75	-1676.23	-1674.84	-1674.87	-1677.12	-1676.61
C44_074	-1674.74	-1674.78	-1677.04	-1676.52	-1674.75	-1674.79	-1677.04	-1676.53	-1674.48	-1674.52	-1676.78	-1676.26	-1674.88	-1674.92	-1677.17	-1676.66
C44_075	-1674.83	-1674.88	-1677.13	-1676.62	-1674.81	-1674.85	-1677.1	-1676.59	-1674.56	-1674.6	-1676.86	-1676.35	-1674.95	-1675	-1677.24	-1676.74
C44_076	-1674.75	-1674.79	-1677.04	-1676.53	-1674.72	-1674.75	-1677.01	-1676.49	-1674.48	-1674.52	-1676.78	-1676.26	-1674.85	-1674.89	-1677.14	-1676.63
C44_077	-1674.79	-1674.83	-1677.08	-1676.57	-1674.78	-1674.82	-1677.07	-1676.57	-1674.53	-1674.56	-1676.82	-1676.31	-1674.91	-1674.95	-1677.2	-1676.69
C44_078	-1674.79	-1674.82	-1677.08	-1676.57	-1674.78	-1674.82	-1677.07	-1676.56	-1674.53	-1674.56	-1676.82	-1676.31	-1674.91	-1674.95	-1677.2	-1676.69
C44_079	-1674.74	-1674.77	-1677.03	-1676.51	-1674.74	-1674.78	-1677.03	-1676.52	-1674.48	-1674.51	-1676.77	-1676.26	-1674.87	-1674.91	-1677.16	-1676.65
C44_080	-1674.79	-1674.83	-1677.09	-1676.57	-1674.79	-1674.84	-1677.09	-1676.58	-1674.54	-1674.57	-1676.83	-1676.32	-1674.92	-1674.96	-1677.21	-1676.71
C44_081	-1674.71	-1674.74	-1677	-1676.48	-1674.69	-1674.73	-1676.98	-1676.47	-1674.44	-1674.47	-1676.74	-1676.22	-1674.83	-1674.87	-1677.12	-1676.6
C44_082	-1674.73	-1674.76	-1677.02	-1676.5	-1674.73	-1674.77	-1677.02	-1676.51	-1674.48	-1674.51	-1676.78	-1676.26	-1674.85	-1674.89	-1677.14	-1676.62
C44_083	-1674.73	-1674.77	-1677.03	-1676.51	-1674.73	-1674.76	-1677.02	-1676.5	-1674.48	-1674.5	-1676.77	-1676.25	-1674.85	-1674.89	-1677.14	-1676.63
C44_084	-1674.74	-1674.78	-1677.04	-1676.52	-1674.72	-1674.76	-1677.01	-1676.5	-1674.48	-1674.51	-1676.78	-1676.26	-1674.85	-1674.89	-1677.14	-1676.63
C44_085	-1674.65	-1674.68	-1676.94	-1676.42	-1674.62	-1674.65	-1676.91	-1676.39	-1674.39	-1674.41	-1676.68	-1676.15	-1674.76	-1674.8	-1677.05	-1676.54
C44_086	-1674.62	-1674.64	-1676.91	-1676.38	-1674.6	-1674.62	-1676.89	-1676.37	-1674.36	-1674.38	-1676.65	-1676.12	-1674.73	-1674.76	-1677.02	-1676.5
C44_087	-1674.8	-1674.83	-1677.09	-1676.57	-1674.78	-1674.83	-1677.08	-1676.57	-1674.53	-1674.57	-1676.83	-1676.31	-1674.92	-1674.96	-1677.21	-1676.7
C44_088	-1674.79	-1674.82	-1677.08	-1676.57	-1674.77	-1674.82	-1677.07	-1676.56	-1674.52	-1674.56	-1676.82	-1676.3	-1674.91	-1674.95	-1677.2	-1676.69
C44_089	-1674.83	-1674.88	-1677.13	-1676.62	-1674.8	-1674.84	-1677.1	-1676.59	-1674.56	-1674.6	-1676.86	-1676.34	-1674.95	-1675	-1677.24	-1676.74
C46_001	-1750.71	-1750.74	-1753.11	-1752.56	-1750.7	-1750.72	-1753.09	-1752.54	-1750.45	-1750.47	-1752.85	-1752.29	-1750.83	-1750.86	-1753.22	-1752.68
C46_002	-1750.8	-1750.83	-1753.2	-1752.65	-1750.81	-1750.85	-1753.21	-1752.67	-1750.56	-1750.59	-1752.96	-1752.42	-1750.93	-1750.96	-1753.32	-1752.78
C46_003	-1750.79	-1750.82	-1753.18	-1752.64	-1750.77	-1750.79	-1753.16	-1752.61	-1750.53	-1750.56	-1752.93	-1752.38	-1750.9	-1750.93	-1753.29	-1752.75
C46_004	-1750.8	-1750.83	-1753.19	-1752.65	-1750.79	-1750.83	-1753.19	-1752.65	-1750.55	-1750.57	-1752.94	-1752.4	-1750.92	-1750.96	-1753.31	-1752.78
C46_005	-1750.82	-1750.85	-1753.22	-1752.67	-1750.81	-1750.84	-1753.21	-1752.66	-1750.57	-1750.6	-1752.97	-1752.42	-1750.94	-1750.97	-1753.33	-1752.79
C46_006	-1750.77	-1750.79	-1753.16	-1752.61	-1750.75	-1750.78	-1753.15	-1752.6	-1750.51	-1750.54	-1752.91	-1752.36	-1750.88	-1750.91	-1753.27	-1752.73
C46_007	-1750.81	-1750.84	-1753.2	-1752.66	-1750.8	-1750.83	-1753.19	-1752.65	-1750.56	-1750.59	-1752.95	-1752.41	-1750.93	-1750.96	-1753.32	-1752.78
C46_008	-1750.83	-1750.86	-1753.22	-1752.68	-1750.82	-1750.85	-1753.22	-1752.67	-1750.58	-1750.61	-1752.98	-1752.44	-1750.95	-1750.98	-1753.34	-1752.8
C46_009	-1750.77	-1750.8	-1753.17	-1752.62	-1750.76	-1750.79	-1753.16	-1752.61	-1750.52	-1750.55	-1752.92	-1752.37	-1750.89	-1750.92	-1753.28	-1752.74
C46_010	-1750.8	-1750.84	-1753.2	-1752.65	-1750.79	-1750.83	-1753.19	-1752.65	-1750.55	-1750.58	-1752.94	-1752.4	-1750.92	-1750.96	-1753.32	-1752.78
C46_011	-1750.81	-1750.84	-1753.21	-1752.66	-1750.79	-1750.82	-1753.18	-1752.64	-1750.55	-1750.58	-1752.95	-1752.41	-1750.92	-1750.96	-1753.31	-1752.77
C46_012	-1750.85	-1750.89	-1753.25	-1752.71	-1750.83	-1750.86	-1753.23	-1752.68	-1750.6	-1750.63	-1753	-1752.45	-1750.96	-1751	-1753.35	-1752.82
C46_013	-1750.89	-1750.93	-1753.29	-1752.75	-1750.87	-1750.91	-1753.27	-1752.73	-1750.64	-1750.67	-1753.04	-1752.5	-1751	-1751.04	-1753.39	-1752.86
C46_014	-1750.86	-1750.89	-1753.25	-1752.71	-1750.84	-1750.87	-1753.23	-1752.69	-1750.61	-1750.64	-1753	-1752.46	-1750.96	-1751	-1753.35	-1752.82
C46_015	-1750.77	-1750.8	-1753.16	-1752.61	-1750.76	-1750.79	-1753.16	-1752.61	-1750.52	-1750.54	-1752.92	-1752.37	-1750.88	-1750.92	-1753.28	-1752.74
C46_016	-1750.82	-1750.86	-1753.22	-1752.67	-1750.82	-1750.85	-1753.21	-1752.67	-1750.58	-1750.61	-1752.97	-1752.43	-1750.94	-1750.98	-1753.33	-1752.79
C46_017	-1750.83	-1750.86	-1753.23	-1752.68	-1750.83	-1750.86	-1753.22	-1752.68	-1750.58	-1750.61	-1752.98	-1752.43	-1750.95	-1750.99	-1753.34	-1752.8
C46_018	-1750.85	-1750.89	-1753.25	-1752.71	-1750.84	-1750.87	-1753.23	-1752.69	-1750.6	-1750.63	-1752.99	-1752.45	-1750.97	-1751.01	-1753.36	-1752.82
C46_019	-1750.84	-1750.87	-1753.23	-1752.69	-1750.82	-1750.86	-1753.22	-1752.68	-1750.58	-1750.62	-1752.98	-1752.44	-1750.95	-1750.99	-1753.34	-1752.8
C46_020	-1750.75	-1750.78	-1753.14	-1752.6	-1750.73	-1750.76	-1753.12	-1752.58	-1750.49	-1750.52	-1752.89	-1752.34	-1750.86	-1750.89	-1753.25	-1752.71
C46_021	-1750.78	-1750.81	-1753.18	-1752.63	-1750.78	-1750.82	-1753.18	-1752.64	-1750.54	-1750.56	-1752.93	-1752.39	-1750.91	-1750.94	-1753.3	-1752.76
C46_022	-1750.83	-1750.85	-1753.22	-1752.67	-1750.82	-1750.85	-1753.21	-1752.67	-1750.57	-1750.59	-1752.97	-1752.42	-1750.95	-1750.98	-1753.34	-1752.79
C46_023	-1750.87	-1750.9	-1753.26	-1752.72	-1750.86	-1750.9	-1753.26	-1752.72	-1750.61	-1750.65	-1753.01	-1752.47	-1750.99	-1751.03	-1753.38	-1752.85
C46_024	-1750.88	-1750.91	-1753.27	-1752.73	-1750.87	-1750.91	-1753.27	-1752.73	-1750.63	-1750.66	-1753.02	-1752.48	-1751	-1751.04	-1753.39	-1752.86
C46_025	-1750.87	-1750.9	-1753.26	-1752.72	-1750.85	-1750.88	-1753.25	-1752.71	-1750.61	-1750.64	-1753.01	-1752.46	-1750.98	-1751.02	-1753.37	-1752.84
C46_026	-1750.81	-1750.85	-1753.21	-1752.67	-1750.8	-1750.83	-1753.2	-1752.65	-1750.56	-1750.59	-1752.96	-1752.41	-1750.93	-1750.97	-1753.32	-1752.78
C46_027	-1750.85	-1750.88	-1753.24	-1752.7	-1750.83	-1750.87	-1753.23	-1752.69	-1750.59	-1750.62	-1752.99	-1752.45	-1750.96	-1751	-1753.35	-1752.82
C46_028	-1750.83	-1750.86	-1753.22	-1752.68	-1750.82	-1750.85	-1753.21	-1752.67	-1750.57	-1750.6	-1752.97	-1752.43	-1750.95	-1750.99	-1753.34	-1752.8
C46_029	-1750.87	-1750.9	-1753.26	-1752.72	-1750.85	-1750.89	-1753.25	-1752.71	-1750.61	-1750.64	-1753.01	-1752.47	-1750.98	-1751.02	-1753.38	-1752.84
C46_030	-1750.86	-1750.9	-1753.26	-1752.72	-1750.85	-1750.89	-1753.25	-1752.71	-1750.61	-1750.64	-1753.01	-1752.47	-1750.97	-1751.02	-1753.37	-1752.83
C46_031	-1750.8	-1750.82	-1753.19	-1752.64	-1750.79	-1750.82	-1753.19	-1752.65	-1750.55	-1750.57	-1752.94	-1752.39	-1750.92	-1750.95	-1753.31	-1752.77
C46_032	-1750.85	-1750.89	-1753.25	-1752.71	-1750.85	-1750.89	-1753.25	-1752.71	-1750.6	-1750.63	-1753	-1752.46	-1750.98	-1751.01	-1753.37	-1752.83
C46_033	-1750.8	-1750.83	-1753.19	-1752.65	-1750.79	-1750.82	-1753.19	-1752.64	-1750.55	-1750.58	-1752.94	-1752.4	-1750.92	-1750.95	-1753.31	-1752.77
C46_034	-1750.88	-1750.91	-1753.27	-1752.73	-1750.86	-1750.9	-1753.26	-1752.72	-1750.62	-1750.65	-1753.02	-1752.48	-1750.99	-1751.03	-1753.38	-1752.85
C46_035	-1750.89	-1750.92	-1753.28	-1752.74	-1750.87	-1750.91	-1753.27	-1752.73	-1750.63	-1750.66	-1753.03	-1752.49	-1751	-1751.04	-1753.4	-1752.86
C46_036	-1750.89	-1750.93	-1753.28	-1752.75	-1750.87	-1750.91	-1753.27	-1752.73	-1750.63	-1750.66	-1753.03	-1752.49	-1751	-1751.04	-1753.39	-1752.86
C46_037	-1750.82	-1750.86	-1753.22	-1752.67	-1750.82	-1750.86	-1753.22	-1752.68	-1750.57	-1750.61	-1752.97	-1752.43	-1750.95	-1750.99	-1753.34	-1752.81
C46_038	-1750.84	-1750.87	-1753.24	-1752.69	-1750.84	-1750.87	-1753.23	-1752.69	-1750.59	-1750.62	-1752.99	-1752.44	-1750.97	-1751.01	-1753.36	-1752.83
C46_039	-1750.89	-1750.93	-1753.29	-1752.75	-1750.88	-1750.91	-1753.27	-1752.73	-1750.63	-1750.67	-1753.03	-1752.49	-1751.01	-1751.06	-1753.41	-1752.87
C46_040	-1750.92	-1750.96	-1753.31	-1752.78	-1750.9	-1750.93	-1753.29	-1752.76	-1750.66	-1750.7	-1753.06	-1752.52	-1751.03	-1751.07	-1753.42	-1752.89
C46_041	-1750.86	-1750.9	-1753.25	-1752.72	-1750.84	-1750.88	-1753.24	-1752.7	-1750.6	-1750.63	-1753	-1752.46	-1750.97	-1751.01	-1753.36	-1752.83
C46_042	-1750.79	-1750.83	-1753.19	-1752.64	-1750.77	-1750.8	-1753.17	-1752.62	-1750.53	-1750.56	-1752.93	-1752.38	-1750.9	-1750.94	-1753.29	-1752.76
C46_043	-1750.87	-1750.91	-1753.27	-1752.73	-1750.88	-1750.91	-1753.27	-1752.73	-1750.63	-1750.66	-1753.03	-1752.49	-1751	-1751.04	-1753.39	-1752.85
C46_044	-1750.88	-1750.92	-1753.28	-1752.74	-1750.87	-1750.91	-1753.27	-1752.73	-1750.63	-1750.65	-1753.03	-1752.48	-1751.01	-1751.05	-1753.4	-1752.86
C46_045	-1750.81	-1750.84	-1753.2	-1752.66	-1750.79	-1750.83	-1753.19	-1752.65	-1750.55	-1750.58	-1752.95	-1752.4	-1750.93	-1750.97	-1753.32	-1752.79
C46_046	-1750.89	-1750.93	-1753.29	-1752.75	-1750.9	-1750.94	-1753.3	-1752.76	-1750.64	-1750.68	-1753.04	-1752.5	-1751.02	-1751.07	-1753.41	-1752.88
C46_047	-1750.83	-1750.86	-1753.23	-1752.68	-1750.83	-1750.87	-1753.23	-1752.69	-1750.58	-1750.61	-1752.98	-1752.43	-1750.96	-1751	-1753.35	-1752.82
C46_048	-1750.82	-1750.85	-1753.21	-1752.67	-1750.81	-1750.85	-1753.21	-1752.67	-1750.57	-1750.6	-1752.96	-1752.42	-1750.94	-1750.98	-1753.33	-1752.79
C46_049	-1750.85	-1750.89	-1753.25	-1752.7	-1750.84	-1750.87	-1753.23	-1752.69	-1750.59	-1750.62	-1752.99	-1752.44	-1750.97	-1751.01	-1753.36	-1752.83
C46_050	-1750.89	-1750.93	-1753.29	-1752.75	-1750.87	-1750.91	-1753.27	-1752.73	-1750.63	-1750.66	-1753.03	-1752.48	-1751.01	-1751.05	-1753.4	-1752.87
C46_051	-1750.89	-1750.92	-1753.29	-1752.74	-1750.89	-1750.93	-1753.28	-1752.75	-1750.64	-1750.67	-1753.04	-1752.5	-1751.01	-1751.05	-1753.4	-1752.87
C46_052	-1750.85	-1750.88	-1753.25	-1752.7	-1750.85	-1750.88	-1753.24	-1752.7	-1750.6	-1750.63	-1753	-1752.45	-1750.98	-1751.01	-1753.37	-1752.83
C46_053	-1750.83	-1750.86	-1753.23	-1752.68	-1750.83	-1750.86	-1753.23	-1752.68	-1750.58	-1750.6	-1752.98	-1752.42	-1750.96	-1751	-1753.35	-1752.82
C46_054	-1750.91	-1750.94	-1753.3	-1752.76	-1750.89	-1750.93	-1753.29	-1752.75	-1750.65	-1750.68	-1753.05	-1752.5	-1751.03	-1751.07	-1753.42	-1752.89
C46_055	-1750.9	-1750.94	-1753.29	-1752.76	-1750.89	-1750.93	-1753.29	-1752.75	-1750.64	-1750.68	-1753.04	-1752.5	-1751.02	-1751.06	-1753.41	-1752.88
C46_056	-1750.87	-1750.9	-1753.26	-1752.72	-1750.84	-1750.88	-1753.24	-1752.7	-1750.6	-1750.63	-1753	-1752.46	-1750.98	-1751.02	-1753.38	-1752.84
C46_057	-1750.82	-1750.85	-1753.21	-1752.67	-1750.81	-1750.85	-1753.21	-1752.67	-1750.57	-1750.6	-1752.97	-1752.42	-1750.94	-1750.98	-1753.33	-1752.8
C46_058	-1750.85	-1750.88	-1753.24	-1752.7	-1750.83	-1750.87	-1753.23	-1752.7	-1750.59	-1750.62	-1752.99	-1752.44	-1750.97	-1751.01	-1753.36	-1752.83
C46_059	-1750.9	-1750.94	-1753.3	-1752.76	-1750.87	-1750.91	-1753.27	-1752.73	-1750.63	-1750.67	-1753.03	-1752.49	-1751.01	-1751.06	-1753.41	-1752.87
C46_060	-1750.94	-1750.98	-1753.33	-1752.8	-1750.91	-1750.96	-1753.31	-1752.78	-1750.67	-1750.71	-1753.07	-1752.53	-1751.05	-1751.1	-1753.45	-1752.92
C46_061	-1750.89	-1750.93	-1753.29	-1752.75	-1750.88	-1750.92	-1753.28	-1752.74	-1750.63	-1750.67	-1753.03	-1752.49	-1751.01	-1751.05	-1753.4	-1752.87
C46_062	-1750.88	-1750.92	-1753.28	-1752.74	-1750.88	-1750.92	-1753.28	-1752.74	-1750.63	-1750.67	-1753.03	-1752.49	-1751	-1751.05	-1753.4	-1752.86
C46_063	-1750.91	-1750.94	-1753.3	-1752.76	-1750.88	-1750.93	-1753.28	-1752.75	-1750.64	-1750.68	-1753.04	-1752.51	-1751.02	-1751.06	-1753.41	-1752.88
C46_064	-1750.86	-1750.89	-1753.25	-1752.71	-1750.85	-1750.89	-1753.25	-1752.71	-1750.61	-1750.64	-1753.01	-1752.46	-1750.98	-1751.02	-1753.37	-1752.84
C46_065	-1750.92	-1750.95	-1753.31	-1752.77	-1750.9	-1750.95	-1753.3	-1752.77	-1750.66	-1750.7	-1753.06	-1752.52	-1751.04	-1751.08	-1753.43	-1752.9
C46_066	-1750.93	-1750.97	-1753.33	-1752.79	-1750.91	-1750.95	-1753.31	-1752.78	-1750.67	-1750.71	-1753.07	-1752.53	-1751.05	-1751.09	-1753.44	-1752.91
C46_067	-1750.95	-1751	-1753.35	-1752.82	-1750.93	-1750.97	-1753.32	-1752.79	-1750.69	-1750.73	-1753.09	-1752.55	-1751.07	-1751.12	-1753.46	-1752.93
C46_068	-1750.91	-1750.94	-1753.3	-1752.76	-1750.9	-1750.94	-1753.29	-1752.76	-1750.65	-1750.68	-1753.05	-1752.51	-1751.03	-1751.07	-1753.42	-1752.89
C46_069	-1750.93	-1750.97	-1753.33	-1752.79	-1750.93	-1750.97	-1753.32	-1752.8	-1750.68	-1750.72	-1753.08	-1752.54	-1751.05	-1751.1	-1753.45	-1752.92
C46_070	-1750.9	-1750.94	-1753.29	-1752.76	-1750.9	-1750.94	-1753.3	-1752.76	-1750.64	-1750.68	-1753.04	-1752.5	-1751.03	-1751.07	-1753.42	-1752.89
C46_071	-1750.86	-1750.9	-1753.26	-1752.71	-1750.84	-1750.88	-1753.24	-1752.7	-1750.6	-1750.63	-1753	-1752.46	-1750.98	-1751.02	-1753.37	-1752.83
C46_072	-1750.9	-1750.94	-1753.3	-1752.76	-1750.89	-1750.93	-1753.29	-1752.75	-1750.65	-1750.68	-1753.05	-1752.5	-1751.02	-1751.06	-1753.41	-1752.88
C46_073	-1750.89	-1750.93	-1753.29	-1752.75	-1750.89	-1750.92	-1753.28	-1752.75	-1750.64	-1750.68	-1753.04	-1752.5	-1751.01	-1751.05	-1753.41	-1752.87
C46_074	-1750.92	-1750.96	-1753.32	-1752.78	-1750.9	-1750.94	-1753.29	-1752.76	-1750.66	-1750.69	-1753.06	-1752.52	-1751.04	-1751.08	-1753.43	-1752.9
C46_075	-1750.9	-1750.94	-1753.3	-1752.77	-1750.88	-1750.92	-1753.28	-1752.74	-1750.65	-1750.68	-1753.05	-1752.51	-1751.01	-1751.06	-1753.41	-1752.88
C46_076	-1750.88	-1750.91	-1753.27	-1752.73	-1750.85	-1750.89	-1753.25	-1752.71	-1750.62	-1750.65	-1753.02	-1752.48	-1750.98	-1751.03	-1753.38	-1752.84
C46_077	-1750.86	-1750.9	-1753.26	-1752.72	-1750.84	-1750.87	-1753.23	-1752.69	-1750.6	-1750.63	-1753	-1752.46	-1750.97	-1751	-1753.36	-1752.82
C46_078	-1750.89	-1750.93	-1753.29	-1752.75	-1750.89	-1750.93	-1753.28	-1752.75	-1750.64	-1750.68	-1753.04	-1752.5	-1751.01	-1751.05	-1753.4	-1752.87
C46_079	-1750.91	-1750.95	-1753.31	-1752.77	-1750.89	-1750.93	-1753.29	-1752.76	-1750.65	-1750.69	-1753.05	-1752.51	-1751.03	-1751.07	-1753.42	-1752.89
C46_080	-1750.86	-1750.9	-1753.26	-1752.72	-1750.86	-1750.9	-1753.26	-1752.72	-1750.61	-1750.64	-1753.01	-1752.47	-1750.99	-1751.03	-1753.38	-1752.84
C46_081	-1750.9	-1750.94	-1753.3	-1752.76	-1750.89	-1750.94	-1753.29	-1752.76	-1750.65	-1750.68	-1753.05	-1752.51	-1751.02	-1751.07	-1753.42	-1752.89
C46_082	-1750.88	-1750.92	-1753.28	-1752.74	-1750.87	-1750.91	-1753.27	-1752.73	-1750.63	-1750.66	-1753.03	-1752.48	-1751	-1751.05	-1753.4	-1752.86
C46_083	-1750.87	-1750.91	-1753.27	-1752.73	-1750.85	-1750.89	-1753.25	-1752.72	-1750.61	-1750.64	-1753.01	-1752.46	-1750.99	-1751.03	-1753.38	-1752.85
C46_084	-1750.89	-1750.92	-1753.28	-1752.74	-1750.89	-1750.92	-1753.28	-1752.75	-1750.64	-1750.67	-1753.04	-1752.49	-1751.01	-1751.05	-1753.4	-1752.87
C46_085	-1750.93	-1750.97	-1753.32	-1752.79	-1750.92	-1750.96	-1753.32	-1752.79	-1750.67	-1750.71	-1753.07	-1752.54	-1751.05	-1751.09	-1753.44	-1752.91
C46_086	-1750.95	-1750.99	-1753.35	-1752.82	-1750.93	-1750.97	-1753.33	-1752.79	-1750.68	-1750.72	-1753.08	-1752.54	-1751.07	-1751.12	-1753.46	-1752.94
C46_087	-1750.91	-1750.95	-1753.31	-1752.78	-1750.9	-1750.94	-1753.3	-1752.77	-1750.65	-1750.68	-1753.05	-1752.51	-1751.04	-1751.09	-1753.44	-1752.91
C46_088	-1750.95	-1750.99	-1753.35	-1752.81	-1750.92	-1750.97	-1753.32	-1752.79	-1750.68	-1750.72	-1753.08	-1752.54	-1751.06	-1751.11	-1753.46	-1752.93
C46_089	-1750.88	-1750.92	-1753.28	-1752.74	-1750.88	-1750.92	-1753.28	-1752.74	-1750.64	-1750.67	-1753.04	-1752.49	-1751.01	-1751.05	-1753.4	-1752.87
C46_090	-1750.94	-1750.98	-1753.34	-1752.8	-1750.93	-1750.97	-1753.32	-1752.79	-1750.68	-1750.71	-1753.08	-1752.54	-1751.07	-1751.11	-1753.46	-1752.93
C46_091	-1750.87	-1750.91	-1753.27	-1752.72	-1750.88	-1750.91	-1753.27	-1752.73	-1750.62	-1750.65	-1753.02	-1752.47	-1751	-1751.04	-1753.39	-1752.86
C46_092	-1750.92	-1750.95	-1753.31	-1752.77	-1750.9	-1750.94	-1753.3	-1752.76	-1750.64	-1750.68	-1753.04	-1752.5	-1751.04	-1751.09	-1753.44	-1752.9
C46_093	-1750.91	-1750.95	-1753.31	-1752.77	-1750.9	-1750.94	-1753.3	-1752.76	-1750.66	-1750.69	-1753.06	-1752.51	-1751.03	-1751.07	-1753.43	-1752.89
C46_094	-1750.93	-1750.97	-1753.32	-1752.79	-1750.92	-1750.97	-1753.32	-1752.79	-1750.67	-1750.71	-1753.07	-1752.54	-1751.05	-1751.1	-1753.44	-1752.92
C46_095	-1750.91	-1750.94	-1753.3	-1752.77	-1750.89	-1750.92	-1753.29	-1752.74	-1750.65	-1750.68	-1753.05	-1752.5	-1751.03	-1751.07	-1753.42	-1752.88
C46_096	-1750.91	-1750.94	-1753.3	-1752.76	-1750.9	-1750.93	-1753.29	-1752.76	-1750.65	-1750.68	-1753.05	-1752.5	-1751.03	-1751.07	-1753.42	-1752.89
C46_097	-1750.91	-1750.94	-1753.3	-1752.77	-1750.88	-1750.92	-1753.28	-1752.74	-1750.65	-1750.68	-1753.05	-1752.5	-1751.02	-1751.06	-1753.41	-1752.88
C46_098	-1750.94	-1750.98	-1753.34	-1752.8	-1750.92	-1750.97	-1753.32	-1752.79	-1750.68	-1750.72	-1753.08	-1752.54	-1751.06	-1751.1	-1753.45	-1752.92
C46_099	-1750.97	-1751.01	-1753.37	-1752.84	-1750.95	-1751	-1753.35	-1752.82	-1750.7	-1750.74	-1753.11	-1752.57	-1751.08	-1751.13	-1753.48	-1752.95
C46_100	-1750.93	-1750.97	-1753.33	-1752.79	-1750.91	-1750.96	-1753.31	-1752.78	-1750.67	-1750.7	-1753.07	-1752.53	-1751.05	-1751.1	-1753.44	-1752.92
C46_101	-1750.95	-1750.99	-1753.35	-1752.81	-1750.93	-1750.98	-1753.33	-1752.8	-1750.69	-1750.73	-1753.09	-1752.55	-1751.07	-1751.12	-1753.46	-1752.94
C46_102	-1750.94	-1750.98	-1753.34	-1752.81	-1750.91	-1750.95	-1753.3	-1752.77	-1750.67	-1750.71	-1753.07	-1752.53	-1751.05	-1751.09	-1753.44	-1752.91
C46_103	-1750.97	-1751.02	-1753.37	-1752.84	-1750.96	-1751.01	-1753.36	-1752.83	-1750.71	-1750.75	-1753.11	-1752.58	-1751.09	-1751.14	-1753.49	-1752.96
C46_104	-1750.93	-1750.96	-1753.32	-1752.78	-1750.92	-1750.96	-1753.32	-1752.79	-1750.67	-1750.7	-1753.07	-1752.53	-1751.05	-1751.1	-1753.45	-1752.91
C46_105	-1750.89	-1750.93	-1753.28	-1752.75	-1750.88	-1750.92	-1753.28	-1752.75	-1750.63	-1750.66	-1753.03	-1752.49	-1751.01	-1751.06	-1753.4	-1752.87
C46_106	-1750.93	-1750.97	-1753.33	-1752.79	-1750.92	-1750.97	-1753.32	-1752.79	-1750.67	-1750.71	-1753.07	-1752.54	-1751.05	-1751.1	-1753.45	-1752.92
C46_107	-1750.97	-1751.02	-1753.37	-1752.84	-1750.94	-1750.99	-1753.34	-1752.81	-1750.7	-1750.74	-1753.1	-1752.56	-1751.08	-1751.13	-1753.48	-1752.95
C46_108	-1750.98	-1751.03	-1753.37	-1752.85	-1750.95	-1751	-1753.35	-1752.82	-1750.7	-1750.75	-1753.1	-1752.57	-1751.1	-1751.15	-1753.5	-1752.97
C46_109	-1750.98	-1751.03	-1753.38	-1752.85	-1750.96	-1751.01	-1753.36	-1752.83	-1750.71	-1750.75	-1753.11	-1752.58	-1751.1	-1751.16	-1753.5	-1752.98
C46_110	-1750.94	-1750.99	-1753.34	-1752.81	-1750.93	-1750.98	-1753.33	-1752.8	-1750.68	-1750.72	-1753.08	-1752.54	-1751.07	-1751.11	-1753.46	-1752.93
C46_111	-1750.94	-1750.98	-1753.34	-1752.8	-1750.91	-1750.95	-1753.31	-1752.77	-1750.67	-1750.71	-1753.07	-1752.54	-1751.05	-1751.09	-1753.44	-1752.91
C46_112	-1750.93	-1750.97	-1753.32	-1752.79	-1750.91	-1750.95	-1753.31	-1752.77	-1750.67	-1750.7	-1753.07	-1752.53	-1751.05	-1751.09	-1753.44	-1752.91
C46_113	-1750.81	-1750.85	-1753.21	-1752.67	-1750.78	-1750.82	-1753.18	-1752.64	-1750.55	-1750.58	-1752.95	-1752.4	-1750.92	-1750.96	-1753.31	-1752.78
C46_114	-1750.97	-1751.02	-1753.37	-1752.84	-1750.96	-1751.01	-1753.36	-1752.83	-1750.71	-1750.75	-1753.11	-1752.58	-1751.09	-1751.14	-1753.49	-1752.96
C46_115	-1750.92	-1750.96	-1753.32	-1752.78	-1750.92	-1750.96	-1753.32	-1752.78	-1750.67	-1750.7	-1753.07	-1752.53	-1751.04	-1751.09	-1753.44	-1752.91
C46_116	-1750.97	-1751.01	-1753.36	-1752.83	-1750.95	-1751	-1753.35	-1752.83	-1750.7	-1750.74	-1753.1	-1752.57	-1751.09	-1751.14	-1753.49	-1752.96
C48_001	-1826.85	-1826.87	-1829.35	-1828.77	-1826.84	-1826.87	-1829.34	-1828.77	-1826.6	-1826.62	-1829.1	-1828.52	-1826.98	-1827	-1829.47	-1828.9
C48_002	-1826.79	-1826.82	-1829.29	-1828.71	-1826.78	-1826.8	-1829.28	-1828.7	-1826.55	-1826.57	-1829.05	-1828.47	-1826.91	-1826.93	-1829.4	-1828.82
C48_003	-1826.91	-1826.94	-1829.41	-1828.84	-1826.91	-1826.94	-1829.4	-1828.84	-1826.66	-1826.69	-1829.16	-1828.59	-1827.04	-1827.07	-1829.53	-1828.97
C48_004	-1826.93	-1826.97	-1829.43	-1828.87	-1826.93	-1826.96	-1829.42	-1828.86	-1826.68	-1826.71	-1829.18	-1828.62	-1827.06	-1827.09	-1829.55	-1828.99
C48_005	-1826.88	-1826.91	-1829.38	-1828.81	-1826.87	-1826.9	-1829.37	-1828.8	-1826.63	-1826.66	-1829.13	-1828.56	-1827	-1827.03	-1829.49	-1828.92
C48_006	-1826.9	-1826.93	-1829.4	-1828.83	-1826.89	-1826.92	-1829.38	-1828.82	-1826.65	-1826.67	-1829.15	-1828.58	-1827.02	-1827.05	-1829.51	-1828.95
C48_007	-1826.94	-1826.97	-1829.43	-1828.87	-1826.92	-1826.96	-1829.42	-1828.86	-1826.68	-1826.71	-1829.19	-1828.62	-1827.05	-1827.09	-1829.55	-1828.99
C48_008	-1826.95	-1826.98	-1829.45	-1828.88	-1826.95	-1826.98	-1829.45	-1828.88	-1826.7	-1826.73	-1829.2	-1828.64	-1827.07	-1827.11	-1829.57	-1829.01
C48_009	-1826.91	-1826.94	-1829.41	-1828.83	-1826.9	-1826.92	-1829.39	-1828.82	-1826.66	-1826.68	-1829.16	-1828.58	-1827.02	-1827.06	-1829.52	-1828.95
C48_010	-1826.98	-1827.01	-1829.48	-1828.91	-1826.96	-1827	-1829.46	-1828.9	-1826.73	-1826.76	-1829.23	-1828.66	-1827.09	-1827.13	-1829.58	-1829.02
C48_011	-1826.96	-1827	-1829.46	-1828.9	-1826.95	-1826.99	-1829.45	-1828.89	-1826.71	-1826.74	-1829.21	-1828.64	-1827.08	-1827.12	-1829.58	-1829.02
C48_012	-1826.93	-1826.96	-1829.43	-1828.86	-1826.92	-1826.95	-1829.41	-1828.85	-1826.68	-1826.71	-1829.18	-1828.61	-1827.04	-1827.08	-1829.54	-1828.98
C48_013	-1826.96	-1826.99	-1829.46	-1828.89	-1826.96	-1826.99	-1829.45	-1828.89	-1826.71	-1826.74	-1829.21	-1828.65	-1827.08	-1827.12	-1829.58	-1829.02
C48_014	-1826.89	-1826.92	-1829.38	-1828.81	-1826.87	-1826.9	-1829.37	-1828.8	-1826.63	-1826.66	-1829.13	-1828.57	-1827.01	-1827.04	-1829.5	-1828.93
C48_015	-1826.84	-1826.88	-1829.34	-1828.78	-1826.85	-1826.88	-1829.35	-1828.78	-1826.6	-1826.63	-1829.1	-1828.53	-1826.97	-1827.01	-1829.47	-1828.9
C48_016	-1826.91	-1826.94	-1829.41	-1828.84	-1826.89	-1826.92	-1829.39	-1828.82	-1826.66	-1826.68	-1829.16	-1828.58	-1827.03	-1827.06	-1829.52	-1828.95
C48_017	-1826.95	-1827	-1829.45	-1828.89	-1826.96	-1827	-1829.46	-1828.89	-1826.71	-1826.75	-1829.21	-1828.65	-1827.08	-1827.12	-1829.57	-1829.02
C48_018	-1826.97	-1827.01	-1829.47	-1828.91	-1826.96	-1827	-1829.46	-1828.9	-1826.72	-1826.75	-1829.22	-1828.66	-1827.09	-1827.13	-1829.59	-1829.03
C48_019	-1827	-1827.04	-1829.5	-1828.93	-1826.98	-1827.01	-1829.48	-1828.91	-1826.74	-1826.77	-1829.24	-1828.67	-1827.11	-1827.15	-1829.61	-1829.05
C48_020	-1826.94	-1826.98	-1829.44	-1828.88	-1826.92	-1826.95	-1829.42	-1828.85	-1826.69	-1826.72	-1829.19	-1828.62	-1827.06	-1827.09	-1829.55	-1828.99
C48_021	-1826.99	-1827.03	-1829.49	-1828.93	-1826.98	-1827.01	-1829.48	-1828.91	-1826.74	-1826.77	-1829.24	-1828.67	-1827.11	-1827.15	-1829.61	-1829.04
C48_022	-1827.02	-1827.06	-1829.52	-1828.96	-1827.01	-1827.05	-1829.51	-1828.95	-1826.77	-1826.81	-1829.28	-1828.71	-1827.13	-1827.17	-1829.63	-1829.07
C48_023	-1826.98	-1827.02	-1829.48	-1828.92	-1826.96	-1827	-1829.46	-1828.9	-1826.73	-1826.76	-1829.23	-1828.66	-1827.1	-1827.14	-1829.59	-1829.03
C48_024	-1826.99	-1827.03	-1829.49	-1828.93	-1826.98	-1827.02	-1829.48	-1828.92	-1826.73	-1826.77	-1829.24	-1828.67	-1827.11	-1827.15	-1829.61	-1829.05
C48_025	-1826.98	-1827.02	-1829.48	-1828.91	-1826.97	-1827.01	-1829.47	-1828.92	-1826.72	-1826.76	-1829.22	-1828.66	-1827.1	-1827.15	-1829.6	-1829.04
C48_026	-1826.93	-1826.97	-1829.43	-1828.86	-1826.93	-1826.97	-1829.43	-1828.87	-1826.68	-1826.71	-1829.18	-1828.62	-1827.06	-1827.1	-1829.56	-1829
C48_027	-1826.92	-1826.95	-1829.42	-1828.85	-1826.91	-1826.95	-1829.41	-1828.85	-1826.66	-1826.69	-1829.17	-1828.6	-1827.04	-1827.08	-1829.54	-1828.98
C48_028	-1827.01	-1827.05	-1829.51	-1828.94	-1826.99	-1827.02	-1829.49	-1828.92	-1826.76	-1826.79	-1829.26	-1828.69	-1827.12	-1827.16	-1829.61	-1829.05
C48_029	-1826.99	-1827.03	-1829.49	-1828.93	-1826.98	-1827.02	-1829.48	-1828.92	-1826.74	-1826.78	-1829.24	-1828.68	-1827.11	-1827.15	-1829.6	-1829.04
C48_030	-1826.95	-1826.98	-1829.44	-1828.88	-1826.93	-1826.96	-1829.43	-1828.86	-1826.69	-1826.72	-1829.19	-1828.62	-1827.06	-1827.1	-1829.55	-1828.99
C48_031	-1826.93	-1826.97	-1829.43	-1828.87	-1826.92	-1826.96	-1829.42	-1828.85	-1826.69	-1826.72	-1829.19	-1828.62	-1827.05	-1827.08	-1829.54	-1828.98
C48_032	-1826.99	-1827.02	-1829.49	-1828.92	-1826.99	-1827.02	-1829.49	-1828.92	-1826.74	-1826.77	-1829.25	-1828.67	-1827.11	-1827.15	-1829.6	-1829.05
C48_033	-1827.02	-1827.06	-1829.52	-1828.96	-1827.01	-1827.04	-1829.51	-1828.94	-1826.77	-1826.8	-1829.27	-1828.71	-1827.14	-1827.18	-1829.63	-1829.07
C48_034	-1827.02	-1827.06	-1829.52	-1828.96	-1827	-1827.05	-1829.5	-1828.95	-1826.77	-1826.8	-1829.27	-1828.71	-1827.14	-1827.18	-1829.63	-1829.08
C48_035	-1826.93	-1826.96	-1829.43	-1828.86	-1826.93	-1826.96	-1829.43	-1828.86	-1826.68	-1826.71	-1829.18	-1828.61	-1827.06	-1827.1	-1829.55	-1828.99
C48_036	-1827	-1827.04	-1829.5	-1828.94	-1827	-1827.04	-1829.5	-1828.94	-1826.75	-1826.79	-1829.25	-1828.69	-1827.13	-1827.17	-1829.62	-1829.06
C48_037	-1827.01	-1827.05	-1829.51	-1828.95	-1827	-1827.03	-1829.49	-1828.93	-1826.76	-1826.79	-1829.26	-1828.7	-1827.12	-1827.17	-1829.62	-1829.06
C48_038	-1827.04	-1827.08	-1829.54	-1828.98	-1827.03	-1827.07	-1829.53	-1828.97	-1826.79	-1826.82	-1829.29	-1828.73	-1827.16	-1827.2	-1829.66	-1829.1
C48_039	-1827.01	-1827.05	-1829.51	-1828.94	-1827.01	-1827.05	-1829.51	-1828.95	-1826.77	-1826.8	-1829.27	-1828.7	-1827.13	-1827.17	-1829.63	-1829.07
C48_040	-1827	-1827.04	-1829.5	-1828.94	-1826.99	-1827.02	-1829.49	-1828.92	-1826.75	-1826.78	-1829.26	-1828.69	-1827.12	-1827.16	-1829.62	-1829.05
C48_041	-1827.04	-1827.08	-1829.54	-1828.98	-1827.02	-1827.05	-1829.52	-1828.95	-1826.79	-1826.82	-1829.29	-1828.72	-1827.15	-1827.2	-1829.65	-1829.09
C48_042	-1827.06	-1827.1	-1829.56	-1829	-1827.04	-1827.08	-1829.54	-1828.98	-1826.8	-1826.84	-1829.31	-1828.74	-1827.17	-1827.22	-1829.67	-1829.12
C48_043	-1827.03	-1827.07	-1829.53	-1828.97	-1827.02	-1827.05	-1829.52	-1828.95	-1826.78	-1826.81	-1829.28	-1828.72	-1827.15	-1827.19	-1829.64	-1829.09
C48_044	-1827.05	-1827.09	-1829.55	-1828.99	-1827.04	-1827.08	-1829.54	-1828.98	-1826.79	-1826.83	-1829.3	-1828.74	-1827.17	-1827.22	-1829.67	-1829.11
C48_045	-1827.03	-1827.07	-1829.53	-1828.97	-1827.02	-1827.06	-1829.52	-1828.96	-1826.78	-1826.81	-1829.28	-1828.72	-1827.15	-1827.2	-1829.65	-1829.09
C48_046	-1826.91	-1826.94	-1829.41	-1828.84	-1826.9	-1826.94	-1829.4	-1828.84	-1826.66	-1826.68	-1829.16	-1828.59	-1827.03	-1827.07	-1829.53	-1828.96
C48_047	-1827.02	-1827.06	-1829.52	-1828.96	-1827.01	-1827.04	-1829.51	-1828.94	-1826.77	-1826.8	-1829.27	-1828.7	-1827.14	-1827.18	-1829.64	-1829.08
C48_048	-1827	-1827.03	-1829.5	-1828.93	-1826.99	-1827.04	-1829.49	-1828.94	-1826.75	-1826.78	-1829.25	-1828.69	-1827.12	-1827.16	-1829.61	-1829.06
C48_049	-1826.91	-1826.94	-1829.41	-1828.84	-1826.91	-1826.94	-1829.4	-1828.84	-1826.66	-1826.68	-1829.16	-1828.59	-1827.04	-1827.08	-1829.53	-1828.97
C48_050	-1827.03	-1827.07	-1829.53	-1828.97	-1827.02	-1827.06	-1829.52	-1828.97	-1826.78	-1826.82	-1829.28	-1828.72	-1827.15	-1827.19	-1829.65	-1829.09
C48_051	-1827.05	-1827.1	-1829.55	-1829	-1827.04	-1827.08	-1829.54	-1828.98	-1826.8	-1826.84	-1829.3	-1828.74	-1827.17	-1827.22	-1829.67	-1829.11
C48_052	-1827.01	-1827.05	-1829.51	-1828.95	-1827	-1827.05	-1829.5	-1828.95	-1826.75	-1826.79	-1829.26	-1828.69	-1827.14	-1827.18	-1829.63	-1829.08
C48_053	-1827	-1827.04	-1829.5	-1828.94	-1826.99	-1827.03	-1829.49	-1828.93	-1826.75	-1826.78	-1829.25	-1828.69	-1827.11	-1827.16	-1829.61	-1829.06
C48_054	-1827.03	-1827.07	-1829.53	-1828.96	-1827.01	-1827.05	-1829.51	-1828.95	-1826.77	-1826.81	-1829.28	-1828.71	-1827.15	-1827.19	-1829.64	-1829.09
C48_055	-1827.01	-1827.05	-1829.51	-1828.95	-1827.01	-1827.05	-1829.51	-1828.95	-1826.75	-1826.79	-1829.26	-1828.69	-1827.14	-1827.18	-1829.63	-1829.08
C48_056	-1827	-1827.03	-1829.5	-1828.93	-1826.97	-1827	-1829.47	-1828.9	-1826.74	-1826.77	-1829.24	-1828.67	-1827.1	-1827.15	-1829.6	-1829.04
C48_057	-1826.95	-1826.98	-1829.45	-1828.88	-1826.95	-1826.98	-1829.45	-1828.88	-1826.7	-1826.73	-1829.2	-1828.63	-1827.08	-1827.12	-1829.57	-1829.01
C48_058	-1827.02	-1827.06	-1829.52	-1828.96	-1827.01	-1827.05	-1829.51	-1828.95	-1826.76	-1826.8	-1829.27	-1828.7	-1827.14	-1827.18	-1829.64	-1829.08
C48_059	-1826.92	-1826.95	-1829.42	-1828.85	-1826.92	-1826.95	-1829.42	-1828.85	-1826.67	-1826.69	-1829.17	-1828.6	-1827.05	-1827.09	-1829.55	-1828.98
C48_060	-1826.96	-1827	-1829.46	-1828.9	-1826.95	-1826.98	-1829.45	-1828.88	-1826.7	-1826.74	-1829.21	-1828.64	-1827.08	-1827.12	-1829.58	-1829.02
C48_061	-1827.02	-1827.07	-1829.53	-1828.97	-1827.02	-1827.07	-1829.52	-1828.97	-1826.77	-1826.81	-1829.28	-1828.72	-1827.15	-1827.19	-1829.65	-1829.09
C48_062	-1827.02	-1827.06	-1829.52	-1828.95	-1827.01	-1827.05	-1829.51	-1828.95	-1826.77	-1826.81	-1829.28	-1828.71	-1827.14	-1827.18	-1829.63	-1829.08
C48_063	-1826.92	-1826.96	-1829.42	-1828.86	-1826.91	-1826.95	-1829.41	-1828.85	-1826.67	-1826.7	-1829.17	-1828.6	-1827.04	-1827.08	-1829.54	-1828.98
C48_064	-1826.99	-1827.03	-1829.49	-1828.93	-1826.99	-1827.03	-1829.49	-1828.93	-1826.73	-1826.76	-1829.23	-1828.67	-1827.12	-1827.16	-1829.62	-1829.06
C48_065	-1827.03	-1827.07	-1829.53	-1828.97	-1827.03	-1827.08	-1829.53	-1828.98	-1826.78	-1826.82	-1829.29	-1828.72	-1827.16	-1827.21	-1829.66	-1829.11
C48_066	-1827.02	-1827.05	-1829.52	-1828.95	-1827	-1827.05	-1829.5	-1828.95	-1826.76	-1826.8	-1829.27	-1828.7	-1827.13	-1827.18	-1829.63	-1829.07
C48_067	-1827.05	-1827.09	-1829.55	-1828.99	-1827.03	-1827.08	-1829.53	-1828.98	-1826.8	-1826.83	-1829.3	-1828.74	-1827.16	-1827.21	-1829.66	-1829.11
C48_068	-1826.96	-1826.99	-1829.46	-1828.89	-1826.96	-1826.99	-1829.46	-1828.89	-1826.7	-1826.74	-1829.21	-1828.64	-1827.09	-1827.13	-1829.59	-1829.03
C48_069	-1826.96	-1826.99	-1829.45	-1828.89	-1826.95	-1826.99	-1829.45	-1828.89	-1826.7	-1826.73	-1829.2	-1828.63	-1827.08	-1827.12	-1829.58	-1829.02
C48_070	-1826.98	-1827.01	-1829.48	-1828.91	-1826.97	-1827.01	-1829.47	-1828.91	-1826.72	-1826.76	-1829.23	-1828.66	-1827.11	-1827.14	-1829.6	-1829.04
C48_071	-1827.06	-1827.1	-1829.56	-1829	-1827.05	-1827.09	-1829.55	-1828.99	-1826.81	-1826.85	-1829.31	-1828.75	-1827.17	-1827.21	-1829.67	-1829.11
C48_072	-1827.04	-1827.08	-1829.54	-1828.98	-1827.04	-1827.08	-1829.54	-1828.98	-1826.79	-1826.83	-1829.3	-1828.73	-1827.16	-1827.21	-1829.66	-1829.1
C48_073	-1827.05	-1827.1	-1829.55	-1829	-1827.05	-1827.09	-1829.55	-1828.99	-1826.8	-1826.84	-1829.31	-1828.75	-1827.17	-1827.22	-1829.67	-1829.12
C48_074	-1827.02	-1827.06	-1829.52	-1828.96	-1827.02	-1827.06	-1829.52	-1828.96	-1826.77	-1826.8	-1829.27	-1828.71	-1827.15	-1827.2	-1829.65	-1829.09
C48_075	-1827	-1827.04	-1829.5	-1828.93	-1827	-1827.04	-1829.5	-1828.94	-1826.75	-1826.79	-1829.26	-1828.69	-1827.12	-1827.17	-1829.62	-1829.06
C48_076	-1827	-1827.04	-1829.5	-1828.94	-1826.98	-1827.02	-1829.48	-1828.92	-1826.74	-1826.78	-1829.25	-1828.68	-1827.12	-1827.16	-1829.62	-1829.06
C48_077	-1827.05	-1827.09	-1829.55	-1828.99	-1827.03	-1827.07	-1829.53	-1828.98	-1826.8	-1826.83	-1829.3	-1828.74	-1827.16	-1827.21	-1829.66	-1829.11
C48_078	-1827.05	-1827.09	-1829.55	-1828.99	-1827.04	-1827.08	-1829.54	-1828.99	-1826.79	-1826.83	-1829.29	-1828.73	-1827.17	-1827.22	-1829.67	-1829.11
C48_079	-1827	-1827.04	-1829.5	-1828.94	-1826.99	-1827.03	-1829.49	-1828.93	-1826.74	-1826.78	-1829.25	-1828.68	-1827.12	-1827.16	-1829.62	-1829.06
C48_080	-1827.03	-1827.07	-1829.53	-1828.97	-1827.03	-1827.07	-1829.53	-1828.97	-1826.77	-1826.81	-1829.28	-1828.72	-1827.16	-1827.21	-1829.66	-1829.11
C48_081	-1827.06	-1827.1	-1829.56	-1829	-1827.04	-1827.08	-1829.54	-1828.98	-1826.8	-1826.84	-1829.3	-1828.74	-1827.18	-1827.22	-1829.67	-1829.12
C48_082	-1827.08	-1827.12	-1829.58	-1829.02	-1827.07	-1827.11	-1829.57	-1829.02	-1826.82	-1826.86	-1829.33	-1828.76	-1827.2	-1827.25	-1829.7	-1829.15
C48_083	-1827.1	-1827.15	-1829.6	-1829.05	-1827.1	-1827.15	-1829.6	-1829.05	-1826.85	-1826.89	-1829.36	-1828.79	-1827.23	-1827.28	-1829.73	-1829.18
C48_084	-1827.05	-1827.09	-1829.55	-1828.99	-1827.05	-1827.09	-1829.55	-1828.99	-1826.8	-1826.84	-1829.3	-1828.74	-1827.17	-1827.22	-1829.67	-1829.11
C48_085	-1827.08	-1827.13	-1829.58	-1829.03	-1827.07	-1827.12	-1829.57	-1829.02	-1826.83	-1826.87	-1829.34	-1828.78	-1827.2	-1827.25	-1829.7	-1829.15
C48_086	-1826.97	-1827	-1829.47	-1828.9	-1826.96	-1827	-1829.46	-1828.9	-1826.71	-1826.75	-1829.21	-1828.65	-1827.09	-1827.14	-1829.59	-1829.03
C48_087	-1827.08	-1827.13	-1829.59	-1829.03	-1827.07	-1827.12	-1829.58	-1829.02	-1826.83	-1826.87	-1829.34	-1828.78	-1827.2	-1827.25	-1829.7	-1829.15
C48_088	-1827.08	-1827.12	-1829.58	-1829.02	-1827.07	-1827.11	-1829.57	-1829.02	-1826.82	-1826.86	-1829.33	-1828.77	-1827.2	-1827.25	-1829.69	-1829.14
C48_089	-1827	-1827.03	-1829.5	-1828.93	-1826.99	-1827.03	-1829.49	-1828.93	-1826.74	-1826.77	-1829.24	-1828.68	-1827.12	-1827.16	-1829.62	-1829.06
C48_090	-1827.08	-1827.13	-1829.59	-1829.03	-1827.07	-1827.12	-1829.57	-1829.02	-1826.83	-1826.87	-1829.33	-1828.77	-1827.21	-1827.25	-1829.7	-1829.15
C48_091	-1827.12	-1827.17	-1829.63	-1829.08	-1827.11	-1827.16	-1829.61	-1829.06	-1826.87	-1826.91	-1829.37	-1828.82	-1827.24	-1827.29	-1829.74	-1829.19
C48_092	-1827.07	-1827.12	-1829.57	-1829.02	-1827.08	-1827.12	-1829.58	-1829.02	-1826.82	-1826.86	-1829.32	-1828.76	-1827.21	-1827.26	-1829.71	-1829.16
C48_093	-1827.09	-1827.13	-1829.59	-1829.03	-1827.07	-1827.12	-1829.57	-1829.02	-1826.83	-1826.87	-1829.33	-1828.77	-1827.21	-1827.26	-1829.7	-1829.15
C48_094	-1827.07	-1827.12	-1829.57	-1829.02	-1827.06	-1827.1	-1829.56	-1829	-1826.82	-1826.86	-1829.32	-1828.76	-1827.19	-1827.24	-1829.69	-1829.14
C48_095	-1827.05	-1827.08	-1829.55	-1828.98	-1827.05	-1827.09	-1829.55	-1828.99	-1826.79	-1826.83	-1829.29	-1828.73	-1827.19	-1827.23	-1829.68	-1829.13
C48_096	-1827.01	-1827.05	-1829.51	-1828.95	-1827	-1827.04	-1829.5	-1828.94	-1826.75	-1826.79	-1829.26	-1828.69	-1827.13	-1827.18	-1829.63	-1829.07
C48_097	-1827.03	-1827.07	-1829.53	-1828.97	-1827.02	-1827.06	-1829.52	-1828.96	-1826.77	-1826.81	-1829.27	-1828.71	-1827.15	-1827.19	-1829.65	-1829.09
C48_098	-1827.03	-1827.06	-1829.53	-1828.96	-1827.02	-1827.06	-1829.52	-1828.96	-1826.77	-1826.81	-1829.28	-1828.71	-1827.15	-1827.19	-1829.64	-1829.09
C48_099	-1827.03	-1827.07	-1829.53	-1828.97	-1827.03	-1827.07	-1829.53	-1828.97	-1826.78	-1826.82	-1829.29	-1828.72	-1827.15	-1827.2	-1829.65	-1829.1
C48_100	-1827.05	-1827.1	-1829.55	-1829	-1827.05	-1827.09	-1829.55	-1828.99	-1826.8	-1826.84	-1829.31	-1828.75	-1827.17	-1827.22	-1829.67	-1829.12
C48_101	-1827	-1827.04	-1829.5	-1828.94	-1826.99	-1827.03	-1829.49	-1828.93	-1826.75	-1826.78	-1829.25	-1828.68	-1827.12	-1827.17	-1829.62	-1829.07
C48_102	-1827.06	-1827.1	-1829.56	-1829	-1827.04	-1827.08	-1829.54	-1828.98	-1826.8	-1826.84	-1829.3	-1828.74	-1827.17	-1827.22	-1829.67	-1829.12
C48_103	-1827.07	-1827.11	-1829.57	-1829.01	-1827.06	-1827.1	-1829.56	-1829	-1826.81	-1826.85	-1829.32	-1828.75	-1827.19	-1827.24	-1829.69	-1829.14
C48_104	-1827.08	-1827.13	-1829.58	-1829.03	-1827.08	-1827.13	-1829.58	-1829.03	-1826.83	-1826.87	-1829.34	-1828.78	-1827.21	-1827.26	-1829.7	-1829.16
C48_105	-1827.01	-1827.05	-1829.51	-1828.95	-1827	-1827.04	-1829.5	-1828.94	-1826.75	-1826.79	-1829.25	-1828.69	-1827.13	-1827.18	-1829.63	-1829.07
C48_106	-1827.03	-1827.08	-1829.53	-1828.98	-1827.02	-1827.06	-1829.52	-1828.97	-1826.78	-1826.82	-1829.28	-1828.72	-1827.15	-1827.2	-1829.65	-1829.1
C48_107	-1827.01	-1827.05	-1829.51	-1828.95	-1827.01	-1827.05	-1829.51	-1828.95	-1826.76	-1826.8	-1829.27	-1828.7	-1827.14	-1827.18	-1829.63	-1829.08
C48_108	-1827.08	-1827.13	-1829.58	-1829.03	-1827.06	-1827.11	-1829.57	-1829.01	-1826.83	-1826.87	-1829.33	-1828.77	-1827.19	-1827.25	-1829.69	-1829.14
C48_109	-1827.03	-1827.07	-1829.53	-1828.97	-1827.02	-1827.06	-1829.52	-1828.96	-1826.77	-1826.81	-1829.28	-1828.71	-1827.15	-1827.2	-1829.65	-1829.09
C48_110	-1827.06	-1827.11	-1829.56	-1829.01	-1827.04	-1827.08	-1829.54	-1828.98	-1826.8	-1826.84	-1829.31	-1828.75	-1827.17	-1827.22	-1829.67	-1829.12
C48_111	-1827.03	-1827.08	-1829.53	-1828.98	-1827.01	-1827.05	-1829.51	-1828.95	-1826.78	-1826.82	-1829.28	-1828.72	-1827.15	-1827.19	-1829.64	-1829.09
C48_112	-1827.03	-1827.07	-1829.53	-1828.97	-1827.02	-1827.06	-1829.52	-1828.96	-1826.78	-1826.81	-1829.28	-1828.72	-1827.15	-1827.19	-1829.64	-1829.09
C48_113	-1827.06	-1827.11	-1829.56	-1829	-1827.05	-1827.09	-1829.55	-1828.99	-1826.81	-1826.85	-1829.31	-1828.75	-1827.18	-1827.22	-1829.67	-1829.12
C48_114	-1826.99	-1827.03	-1829.49	-1828.93	-1826.98	-1827.03	-1829.48	-1828.93	-1826.74	-1826.78	-1829.25	-1828.68	-1827.11	-1827.16	-1829.61	-1829.05
C48_115	-1826.97	-1827.01	-1829.47	-1828.91	-1826.96	-1826.99	-1829.46	-1828.89	-1826.72	-1826.75	-1829.22	-1828.65	-1827.09	-1827.14	-1829.59	-1829.03
C48_116	-1827.04	-1827.08	-1829.54	-1828.98	-1827.03	-1827.07	-1829.53	-1828.97	-1826.79	-1826.83	-1829.29	-1828.73	-1827.16	-1827.21	-1829.66	-1829.1
C48_117	-1827.02	-1827.06	-1829.52	-1828.96	-1827.01	-1827.05	-1829.51	-1828.95	-1826.77	-1826.8	-1829.27	-1828.71	-1827.14	-1827.19	-1829.64	-1829.08
C48_118	-1827.04	-1827.09	-1829.54	-1828.98	-1827.03	-1827.08	-1829.53	-1828.98	-1826.79	-1826.83	-1829.29	-1828.73	-1827.16	-1827.21	-1829.66	-1829.11
C48_119	-1826.98	-1827.02	-1829.48	-1828.92	-1826.97	-1827.01	-1829.47	-1828.91	-1826.73	-1826.76	-1829.23	-1828.67	-1827.1	-1827.15	-1829.6	-1829.04
C48_120	-1826.98	-1827.02	-1829.48	-1828.92	-1826.97	-1827.01	-1829.47	-1828.91	-1826.72	-1826.75	-1829.22	-1828.66	-1827.1	-1827.14	-1829.6	-1829.04
C48_121	-1827.03	-1827.08	-1829.53	-1828.98	-1827.02	-1827.07	-1829.53	-1828.97	-1826.78	-1826.82	-1829.29	-1828.73	-1827.15	-1827.2	-1829.65	-1829.1
C48_122	-1826.97	-1827	-1829.47	-1828.9	-1826.94	-1826.98	-1829.44	-1828.88	-1826.71	-1826.74	-1829.21	-1828.64	-1827.08	-1827.12	-1829.57	-1829.01
C48_123	-1826.95	-1826.99	-1829.45	-1828.89	-1826.95	-1826.98	-1829.45	-1828.88	-1826.7	-1826.73	-1829.2	-1828.63	-1827.08	-1827.12	-1829.58	-1829.02
C48_124	-1827.04	-1827.08	-1829.54	-1828.98	-1827.04	-1827.08	-1829.54	-1828.99	-1826.79	-1826.83	-1829.3	-1828.73	-1827.16	-1827.21	-1829.66	-1829.11
C48_125	-1827.04	-1827.08	-1829.54	-1828.98	-1827.02	-1827.05	-1829.52	-1828.95	-1826.78	-1826.82	-1829.29	-1828.72	-1827.15	-1827.19	-1829.65	-1829.09
C48_126	-1827.04	-1827.08	-1829.55	-1828.98	-1827.02	-1827.06	-1829.52	-1828.96	-1826.79	-1826.82	-1829.29	-1828.72	-1827.16	-1827.2	-1829.66	-1829.1
C48_127	-1827.1	-1827.14	-1829.6	-1829.04	-1827.08	-1827.12	-1829.58	-1829.02	-1826.84	-1826.88	-1829.34	-1828.78	-1827.21	-1827.26	-1829.71	-1829.16
C48_128	-1827.06	-1827.1	-1829.56	-1829	-1827.04	-1827.08	-1829.54	-1828.98	-1826.8	-1826.84	-1829.31	-1828.74	-1827.18	-1827.22	-1829.67	-1829.12
C48_129	-1827.04	-1827.08	-1829.54	-1828.98	-1827.04	-1827.09	-1829.54	-1828.99	-1826.79	-1826.83	-1829.29	-1828.73	-1827.17	-1827.21	-1829.66	-1829.11
C48_130	-1827.04	-1827.08	-1829.54	-1828.98	-1827.03	-1827.07	-1829.53	-1828.97	-1826.78	-1826.82	-1829.29	-1828.72	-1827.16	-1827.2	-1829.65	-1829.1
C48_131	-1827.06	-1827.11	-1829.56	-1829.01	-1827.05	-1827.09	-1829.55	-1828.99	-1826.81	-1826.85	-1829.31	-1828.75	-1827.18	-1827.23	-1829.68	-1829.12
C48_132	-1827	-1827.03	-1829.5	-1828.93	-1827	-1827.05	-1829.5	-1828.95	-1826.75	-1826.79	-1829.25	-1828.69	-1827.13	-1827.17	-1829.62	-1829.07
C48_133	-1827.07	-1827.12	-1829.58	-1829.02	-1827.07	-1827.11	-1829.57	-1829.01	-1826.82	-1826.86	-1829.32	-1828.76	-1827.2	-1827.25	-1829.7	-1829.15
C48_134	-1827.03	-1827.07	-1829.53	-1828.97	-1827.02	-1827.06	-1829.52	-1828.96	-1826.77	-1826.81	-1829.28	-1828.71	-1827.15	-1827.2	-1829.65	-1829.09
C48_135	-1827.11	-1827.16	-1829.61	-1829.06	-1827.1	-1827.15	-1829.6	-1829.05	-1826.86	-1826.9	-1829.36	-1828.8	-1827.23	-1827.28	-1829.73	-1829.18
C48_136	-1827.04	-1827.08	-1829.54	-1828.98	-1827.03	-1827.06	-1829.53	-1828.96	-1826.79	-1826.82	-1829.29	-1828.72	-1827.16	-1827.2	-1829.65	-1829.1
C48_137	-1827.09	-1827.14	-1829.59	-1829.04	-1827.08	-1827.12	-1829.58	-1829.03	-1826.84	-1826.88	-1829.35	-1828.79	-1827.21	-1827.26	-1829.71	-1829.16
C48_138	-1827.14	-1827.19	-1829.64	-1829.09	-1827.11	-1827.15	-1829.61	-1829.05	-1826.87	-1826.91	-1829.38	-1828.82	-1827.25	-1827.3	-1829.75	-1829.2
C48_139	-1827.14	-1827.19	-1829.64	-1829.09	-1827.11	-1827.16	-1829.61	-1829.06	-1826.88	-1826.92	-1829.38	-1828.82	-1827.25	-1827.3	-1829.75	-1829.2
C48_140	-1827.1	-1827.14	-1829.6	-1829.04	-1827.08	-1827.13	-1829.58	-1829.03	-1826.84	-1826.88	-1829.34	-1828.78	-1827.22	-1827.27	-1829.72	-1829.16
C48_141	-1827.04	-1827.09	-1829.54	-1828.99	-1827.02	-1827.06	-1829.52	-1828.96	-1826.78	-1826.81	-1829.28	-1828.72	-1827.16	-1827.21	-1829.66	-1829.11
C48_142	-1827.06	-1827.09	-1829.56	-1828.99	-1827.07	-1827.12	-1829.57	-1829.02	-1826.81	-1826.85	-1829.31	-1828.76	-1827.19	-1827.24	-1829.69	-1829.14
C48_143	-1827.03	-1827.08	-1829.53	-1828.98	-1827.03	-1827.08	-1829.53	-1828.98	-1826.78	-1826.82	-1829.28	-1828.72	-1827.16	-1827.21	-1829.66	-1829.11
C48_144	-1826.99	-1827.02	-1829.48	-1828.91	-1826.97	-1827	-1829.47	-1828.9	-1826.73	-1826.75	-1829.23	-1828.65	-1827.1	-1827.14	-1829.6	-1829.04
C48_145	-1827.08	-1827.12	-1829.58	-1829.02	-1827.07	-1827.12	-1829.58	-1829.02	-1826.82	-1826.86	-1829.33	-1828.77	-1827.21	-1827.26	-1829.7	-1829.15
C48_146	-1827.06	-1827.1	-1829.56	-1829	-1827.04	-1827.08	-1829.54	-1828.98	-1826.8	-1826.84	-1829.31	-1828.74	-1827.18	-1827.22	-1829.67	-1829.12
C48_147	-1827.07	-1827.12	-1829.58	-1829.02	-1827.07	-1827.11	-1829.57	-1829.01	-1826.82	-1826.86	-1829.33	-1828.76	-1827.2	-1827.24	-1829.69	-1829.14
C48_148	-1827.1	-1827.15	-1829.61	-1829.05	-1827.09	-1827.14	-1829.59	-1829.04	-1826.84	-1826.89	-1829.35	-1828.79	-1827.23	-1827.28	-1829.73	-1829.18
C48_149	-1827.13	-1827.18	-1829.64	-1829.08	-1827.12	-1827.17	-1829.62	-1829.07	-1826.87	-1826.92	-1829.38	-1828.82	-1827.25	-1827.31	-1829.75	-1829.21
C48_150	-1827.12	-1827.17	-1829.62	-1829.07	-1827.11	-1827.16	-1829.61	-1829.06	-1826.86	-1826.91	-1829.37	-1828.81	-1827.24	-1827.3	-1829.74	-1829.19
C48_151	-1827.06	-1827.1	-1829.56	-1829	-1827.06	-1827.11	-1829.57	-1829.01	-1826.82	-1826.85	-1829.32	-1828.76	-1827.19	-1827.23	-1829.68	-1829.13
C48_152	-1827.08	-1827.13	-1829.58	-1829.03	-1827.07	-1827.12	-1829.57	-1829.02	-1826.83	-1826.87	-1829.33	-1828.77	-1827.2	-1827.25	-1829.7	-1829.15
C48_153	-1827.02	-1827.06	-1829.52	-1828.96	-1827.01	-1827.05	-1829.51	-1828.95	-1826.77	-1826.8	-1829.27	-1828.71	-1827.14	-1827.19	-1829.64	-1829.08
C48_154	-1827.07	-1827.12	-1829.58	-1829.02	-1827.06	-1827.11	-1829.56	-1829.01	-1826.82	-1826.86	-1829.32	-1828.76	-1827.19	-1827.24	-1829.69	-1829.14
C48_155	-1827.08	-1827.12	-1829.58	-1829.02	-1827.07	-1827.12	-1829.57	-1829.02	-1826.82	-1826.86	-1829.33	-1828.77	-1827.2	-1827.25	-1829.7	-1829.15
C48_156	-1827.09	-1827.13	-1829.59	-1829.03	-1827.08	-1827.13	-1829.59	-1829.03	-1826.83	-1826.87	-1829.34	-1828.77	-1827.22	-1827.26	-1829.71	-1829.16
C48_157	-1827.05	-1827.09	-1829.55	-1828.99	-1827.02	-1827.07	-1829.52	-1828.97	-1826.79	-1826.83	-1829.29	-1828.73	-1827.16	-1827.21	-1829.66	-1829.1
C48_158	-1827.09	-1827.14	-1829.6	-1829.04	-1827.08	-1827.12	-1829.58	-1829.03	-1826.84	-1826.88	-1829.34	-1828.78	-1827.21	-1827.26	-1829.71	-1829.16
C48_159	-1827.07	-1827.12	-1829.57	-1829.02	-1827.05	-1827.1	-1829.56	-1829	-1826.81	-1826.85	-1829.32	-1828.76	-1827.19	-1827.24	-1829.69	-1829.14
C48_160	-1827.12	-1827.17	-1829.62	-1829.07	-1827.08	-1827.13	-1829.59	-1829.04	-1826.85	-1826.89	-1829.35	-1828.8	-1827.23	-1827.28	-1829.73	-1829.18
C48_161	-1827.12	-1827.17	-1829.62	-1829.07	-1827.08	-1827.12	-1829.58	-1829.02	-1826.85	-1826.89	-1829.35	-1828.79	-1827.22	-1827.28	-1829.72	-1829.17
C48_162	-1827.12	-1827.17	-1829.62	-1829.07	-1827.09	-1827.14	-1829.59	-1829.05	-1826.85	-1826.9	-1829.36	-1828.8	-1827.23	-1827.29	-1829.73	-1829.19
C48_163	-1827.13	-1827.19	-1829.64	-1829.09	-1827.09	-1827.14	-1829.6	-1829.04	-1826.87	-1826.91	-1829.37	-1828.81	-1827.24	-1827.29	-1829.74	-1829.19
C48_164	-1827.07	-1827.11	-1829.57	-1829.01	-1827.06	-1827.11	-1829.57	-1829.01	-1826.82	-1826.86	-1829.33	-1828.76	-1827.19	-1827.24	-1829.69	-1829.14
C48_165	-1827.13	-1827.18	-1829.63	-1829.08	-1827.11	-1827.16	-1829.61	-1829.06	-1826.87	-1826.91	-1829.37	-1828.82	-1827.24	-1827.3	-1829.74	-1829.2
C48_166	-1827.1	-1827.15	-1829.6	-1829.05	-1827.06	-1827.11	-1829.56	-1829.01	-1826.83	-1826.87	-1829.34	-1828.78	-1827.21	-1827.25	-1829.7	-1829.15
C48_167	-1827.11	-1827.16	-1829.61	-1829.06	-1827.1	-1827.16	-1829.61	-1829.06	-1826.85	-1826.9	-1829.36	-1828.8	-1827.23	-1827.28	-1829.73	-1829.18
C48_168	-1827.13	-1827.18	-1829.63	-1829.08	-1827.1	-1827.15	-1829.6	-1829.05	-1826.86	-1826.91	-1829.37	-1828.81	-1827.24	-1827.29	-1829.73	-1829.19
C48_169	-1827.13	-1827.18	-1829.63	-1829.08	-1827.11	-1827.15	-1829.61	-1829.05	-1826.87	-1826.91	-1829.38	-1828.82	-1827.24	-1827.29	-1829.74	-1829.19
C48_170	-1827.01	-1827.06	-1829.51	-1828.96	-1826.98	-1827.02	-1829.48	-1828.92	-1826.75	-1826.79	-1829.25	-1828.69	-1827.12	-1827.17	-1829.62	-1829.07
C48_171	-1827.15	-1827.2	-1829.66	-1829.11	-1827.13	-1827.19	-1829.63	-1829.09	-1826.89	-1826.93	-1829.39	-1828.84	-1827.27	-1827.33	-1829.77	-1829.23
C48_172	-1827.04	-1827.08	-1829.54	-1828.98	-1827.05	-1827.1	-1829.55	-1829	-1826.8	-1826.84	-1829.31	-1828.74	-1827.17	-1827.22	-1829.66	-1829.11
C48_173	-1827.09	-1827.14	-1829.59	-1829.04	-1827.06	-1827.11	-1829.56	-1829.01	-1826.82	-1826.87	-1829.33	-1828.77	-1827.21	-1827.26	-1829.7	-1829.15
C48_174	-1827.04	-1827.08	-1829.54	-1828.98	-1827.04	-1827.08	-1829.54	-1828.99	-1826.79	-1826.83	-1829.3	-1828.73	-1827.17	-1827.21	-1829.66	-1829.11
C48_175	-1827.05	-1827.1	-1829.55	-1829	-1827.02	-1827.06	-1829.52	-1828.96	-1826.79	-1826.82	-1829.29	-1828.73	-1827.16	-1827.21	-1829.66	-1829.11
C48_176	-1827.07	-1827.12	-1829.57	-1829.02	-1827.06	-1827.11	-1829.56	-1829.01	-1826.82	-1826.86	-1829.33	-1828.77	-1827.19	-1827.24	-1829.69	-1829.14
C48_177	-1827.06	-1827.1	-1829.56	-1829	-1827.05	-1827.1	-1829.56	-1829	-1826.82	-1826.85	-1829.32	-1828.76	-1827.18	-1827.22	-1829.67	-1829.12
C48_178	-1827.08	-1827.12	-1829.58	-1829.02	-1827.06	-1827.11	-1829.56	-1829.01	-1826.82	-1826.86	-1829.33	-1828.77	-1827.2	-1827.25	-1829.7	-1829.15
C48_179	-1827.05	-1827.1	-1829.55	-1829	-1827.05	-1827.1	-1829.56	-1829	-1826.8	-1826.84	-1829.31	-1828.75	-1827.18	-1827.23	-1829.68	-1829.13
C48_180	-1827.09	-1827.13	-1829.59	-1829.03	-1827.06	-1827.11	-1829.56	-1829.01	-1826.82	-1826.86	-1829.32	-1828.76	-1827.2	-1827.25	-1829.7	-1829.15
C48_181	-1827.02	-1827.06	-1829.52	-1828.96	-1827.02	-1827.06	-1829.52	-1828.97	-1826.77	-1826.81	-1829.28	-1828.72	-1827.14	-1827.19	-1829.64	-1829.09
C48_182	-1827.04	-1827.08	-1829.54	-1828.98	-1827.03	-1827.08	-1829.53	-1828.98	-1826.79	-1826.83	-1829.29	-1828.73	-1827.16	-1827.21	-1829.66	-1829.1
C48_183	-1827.09	-1827.13	-1829.59	-1829.03	-1827.07	-1827.12	-1829.57	-1829.02	-1826.83	-1826.87	-1829.34	-1828.78	-1827.2	-1827.25	-1829.7	-1829.15
C48_184	-1827.08	-1827.12	-1829.58	-1829.02	-1827.07	-1827.12	-1829.57	-1829.02	-1826.83	-1826.87	-1829.33	-1828.77	-1827.2	-1827.25	-1829.69	-1829.15
C48_185	-1827.1	-1827.14	-1829.6	-1829.04	-1827.07	-1827.12	-1829.57	-1829.03	-1826.83	-1826.87	-1829.34	-1828.78	-1827.21	-1827.26	-1829.71	-1829.16
C48_186	-1826.83	-1826.87	-1829.33	-1828.77	-1826.8	-1826.83	-1829.3	-1828.73	-1826.57	-1826.6	-1829.07	-1828.5	-1826.94	-1826.99	-1829.44	-1828.88
C48_187	-1827.08	-1827.12	-1829.58	-1829.03	-1827.08	-1827.13	-1829.58	-1829.03	-1826.83	-1826.87	-1829.33	-1828.77	-1827.21	-1827.26	-1829.71	-1829.16
C48_188	-1827.1	-1827.15	-1829.6	-1829.05	-1827.08	-1827.13	-1829.58	-1829.03	-1826.83	-1826.87	-1829.34	-1828.78	-1827.23	-1827.28	-1829.72	-1829.18
C48_189	-1827	-1827.02	-1829.5	-1828.92	-1827.01	-1827.05	-1829.51	-1828.95	-1826.75	-1826.79	-1829.26	-1828.7	-1827.12	-1827.17	-1829.62	-1829.06
C48_190	-1827.05	-1827.09	-1829.55	-1828.99	-1827.03	-1827.08	-1829.53	-1828.98	-1826.79	-1826.83	-1829.3	-1828.73	-1827.16	-1827.21	-1829.66	-1829.11
C48_191	-1827.04	-1827.09	-1829.55	-1828.99	-1827.03	-1827.08	-1829.54	-1828.98	-1826.8	-1826.83	-1829.3	-1828.74	-1827.16	-1827.21	-1829.66	-1829.1
C48_192	-1827.12	-1827.17	-1829.62	-1829.07	-1827.1	-1827.15	-1829.6	-1829.05	-1826.85	-1826.9	-1829.36	-1828.8	-1827.24	-1827.29	-1829.74	-1829.19
C48_193	-1827.11	-1827.16	-1829.61	-1829.06	-1827.09	-1827.14	-1829.59	-1829.04	-1826.85	-1826.9	-1829.36	-1828.8	-1827.22	-1827.27	-1829.72	-1829.17
C48_194	-1827.11	-1827.16	-1829.62	-1829.06	-1827.1	-1827.14	-1829.6	-1829.04	-1826.86	-1826.9	-1829.36	-1828.8	-1827.23	-1827.28	-1829.73	-1829.18
C48_195	-1827.12	-1827.16	-1829.62	-1829.06	-1827.11	-1827.16	-1829.61	-1829.06	-1826.86	-1826.9	-1829.37	-1828.81	-1827.24	-1827.29	-1829.74	-1829.19
C48_196	-1827.15	-1827.2	-1829.65	-1829.1	-1827.14	-1827.19	-1829.64	-1829.09	-1826.88	-1826.93	-1829.39	-1828.84	-1827.28	-1827.33	-1829.78	-1829.23
C48_197	-1827.15	-1827.2	-1829.65	-1829.1	-1827.12	-1827.17	-1829.63	-1829.07	-1826.89	-1826.94	-1829.4	-1828.84	-1827.26	-1827.31	-1829.76	-1829.21
C48_198	-1827.11	-1827.16	-1829.61	-1829.06	-1827.08	-1827.12	-1829.58	-1829.02	-1826.85	-1826.89	-1829.35	-1828.8	-1827.21	-1827.26	-1829.71	-1829.16
C48_199	-1827.16	-1827.2	-1829.66	-1829.1	-1827.15	-1827.21	-1829.65	-1829.11	-1826.89	-1826.94	-1829.4	-1828.84	-1827.29	-1827.34	-1829.79	-1829.24
C50_001	-1902.84	-1902.86	-1905.44	-1904.83	-1902.84	-1902.86	-1905.44	-1904.84	-1902.6	-1902.62	-1905.2	-1904.6	-1902.96	-1902.99	-1905.56	-1904.96
C50_002	-1903	-1903.03	-1905.6	-1905	-1902.99	-1903.02	-1905.6	-1905	-1902.74	-1902.77	-1905.35	-1904.75	-1903.13	-1903.16	-1905.72	-1905.13
C50_003	-1902.91	-1902.93	-1905.51	-1904.9	-1902.91	-1902.94	-1905.51	-1904.91	-1902.66	-1902.68	-1905.26	-1904.66	-1903.04	-1903.07	-1905.64	-1905.04
C50_004	-1903.11	-1903.14	-1905.71	-1905.12	-1903.09	-1903.14	-1905.69	-1905.12	-1902.85	-1902.88	-1905.45	-1904.86	-1903.23	-1903.28	-1905.83	-1905.25
C50_005	-1903.1	-1903.14	-1905.71	-1905.11	-1903.09	-1903.13	-1905.69	-1905.11	-1902.84	-1902.87	-1905.45	-1904.85	-1903.23	-1903.27	-1905.83	-1905.24
C50_006	-1903.04	-1903.07	-1905.65	-1905.05	-1903.04	-1903.08	-1905.64	-1905.05	-1902.81	-1902.83	-1905.41	-1904.81	-1903.16	-1903.2	-1905.76	-1905.17
C50_007	-1903.09	-1903.12	-1905.69	-1905.1	-1903.08	-1903.12	-1905.68	-1905.09	-1902.83	-1902.87	-1905.44	-1904.85	-1903.21	-1903.25	-1905.81	-1905.23
C50_008	-1903.15	-1903.18	-1905.75	-1905.16	-1903.13	-1903.18	-1905.74	-1905.16	-1902.89	-1902.93	-1905.5	-1904.91	-1903.27	-1903.31	-1905.87	-1905.29
C50_009	-1903.11	-1903.15	-1905.71	-1905.13	-1903.1	-1903.14	-1905.7	-1905.12	-1902.87	-1902.9	-1905.47	-1904.88	-1903.23	-1903.27	-1905.83	-1905.25
C50_010	-1903.05	-1903.09	-1905.66	-1905.07	-1903.05	-1903.08	-1905.65	-1905.06	-1902.81	-1902.84	-1905.41	-1904.82	-1903.18	-1903.22	-1905.78	-1905.19
C50_011	-1903.07	-1903.1	-1905.67	-1905.08	-1903.06	-1903.09	-1905.66	-1905.07	-1902.82	-1902.85	-1905.42	-1904.83	-1903.19	-1903.23	-1905.79	-1905.2
C50_012	-1903.09	-1903.12	-1905.69	-1905.1	-1903.08	-1903.11	-1905.68	-1905.09	-1902.84	-1902.87	-1905.44	-1904.85	-1903.21	-1903.24	-1905.8	-1905.22
C50_013	-1903.03	-1903.06	-1905.63	-1905.03	-1903.03	-1903.06	-1905.63	-1905.04	-1902.78	-1902.81	-1905.39	-1904.79	-1903.16	-1903.19	-1905.75	-1905.16
C50_014	-1903.09	-1903.13	-1905.7	-1905.11	-1903.09	-1903.13	-1905.69	-1905.1	-1902.84	-1902.88	-1905.45	-1904.86	-1903.22	-1903.26	-1905.82	-1905.23
C50_015	-1903.1	-1903.13	-1905.7	-1905.11	-1903.08	-1903.12	-1905.68	-1905.1	-1902.84	-1902.88	-1905.45	-1904.86	-1903.21	-1903.25	-1905.81	-1905.23
C50_016	-1903.06	-1903.1	-1905.66	-1905.08	-1903.05	-1903.08	-1905.65	-1905.06	-1902.8	-1902.84	-1905.41	-1904.82	-1903.19	-1903.22	-1905.78	-1905.2
C50_017	-1903.09	-1903.13	-1905.69	-1905.11	-1903.08	-1903.12	-1905.68	-1905.1	-1902.84	-1902.87	-1905.44	-1904.86	-1903.22	-1903.26	-1905.81	-1905.23
C50_018	-1903.06	-1903.1	-1905.66	-1905.08	-1903.06	-1903.09	-1905.66	-1905.07	-1902.82	-1902.85	-1905.43	-1904.83	-1903.18	-1903.22	-1905.78	-1905.19
C50_019	-1903.12	-1903.16	-1905.73	-1905.14	-1903.1	-1903.14	-1905.7	-1905.12	-1902.86	-1902.9	-1905.47	-1904.88	-1903.24	-1903.28	-1905.84	-1905.26
C50_020	-1903.15	-1903.19	-1905.75	-1905.17	-1903.14	-1903.19	-1905.75	-1905.17	-1902.9	-1902.94	-1905.51	-1904.92	-1903.27	-1903.32	-1905.87	-1905.29
C50_021	-1903.14	-1903.18	-1905.74	-1905.16	-1903.12	-1903.16	-1905.73	-1905.14	-1902.89	-1902.93	-1905.5	-1904.91	-1903.25	-1903.3	-1905.85	-1905.27
C50_022	-1903.11	-1903.15	-1905.71	-1905.13	-1903.09	-1903.13	-1905.7	-1905.11	-1902.85	-1902.89	-1905.46	-1904.87	-1903.23	-1903.27	-1905.83	-1905.25
C50_023	-1903.15	-1903.19	-1905.75	-1905.17	-1903.14	-1903.18	-1905.74	-1905.16	-1902.9	-1902.94	-1905.5	-1904.92	-1903.27	-1903.31	-1905.87	-1905.29
C50_024	-1903.11	-1903.15	-1905.71	-1905.13	-1903.12	-1903.16	-1905.72	-1905.13	-1902.88	-1902.91	-1905.48	-1904.9	-1903.23	-1903.28	-1905.83	-1905.25
C50_025	-1903.13	-1903.17	-1905.73	-1905.15	-1903.11	-1903.16	-1905.72	-1905.14	-1902.87	-1902.91	-1905.48	-1904.89	-1903.25	-1903.29	-1905.85	-1905.27
C50_026	-1903.14	-1903.18	-1905.75	-1905.16	-1903.12	-1903.16	-1905.72	-1905.14	-1902.88	-1902.92	-1905.49	-1904.9	-1903.26	-1903.3	-1905.85	-1905.27
C50_027	-1903.01	-1903.03	-1905.61	-1905.01	-1903	-1903.04	-1905.61	-1905.02	-1902.76	-1902.78	-1905.36	-1904.76	-1903.13	-1903.17	-1905.73	-1905.14
C50_028	-1903.09	-1903.12	-1905.69	-1905.1	-1903.09	-1903.13	-1905.69	-1905.11	-1902.83	-1902.87	-1905.44	-1904.85	-1903.22	-1903.26	-1905.82	-1905.24
C50_029	-1903.14	-1903.19	-1905.75	-1905.17	-1903.14	-1903.19	-1905.75	-1905.17	-1902.9	-1902.94	-1905.51	-1904.92	-1903.27	-1903.31	-1905.87	-1905.29
C50_030	-1903.14	-1903.19	-1905.75	-1905.17	-1903.13	-1903.17	-1905.73	-1905.15	-1902.89	-1902.93	-1905.5	-1904.91	-1903.26	-1903.31	-1905.86	-1905.28
C50_031	-1903.15	-1903.2	-1905.76	-1905.17	-1903.15	-1903.19	-1905.75	-1905.17	-1902.91	-1902.95	-1905.52	-1904.93	-1903.27	-1903.31	-1905.87	-1905.29
C50_032	-1903.12	-1903.15	-1905.72	-1905.13	-1903.11	-1903.15	-1905.71	-1905.13	-1902.87	-1902.9	-1905.48	-1904.88	-1903.24	-1903.28	-1905.84	-1905.26
C50_033	-1903.14	-1903.18	-1905.75	-1905.16	-1903.12	-1903.16	-1905.73	-1905.14	-1902.89	-1902.93	-1905.5	-1904.91	-1903.26	-1903.3	-1905.86	-1905.28
C50_034	-1903.13	-1903.17	-1905.74	-1905.15	-1903.12	-1903.16	-1905.72	-1905.14	-1902.88	-1902.92	-1905.49	-1904.9	-1903.25	-1903.3	-1905.85	-1905.27
C50_035	-1903.15	-1903.19	-1905.76	-1905.17	-1903.15	-1903.19	-1905.75	-1905.17	-1902.9	-1902.94	-1905.51	-1904.92	-1903.28	-1903.32	-1905.88	-1905.3
C50_036	-1903.13	-1903.17	-1905.74	-1905.15	-1903.13	-1903.17	-1905.73	-1905.15	-1902.88	-1902.92	-1905.49	-1904.9	-1903.26	-1903.3	-1905.86	-1905.28
C50_037	-1903.17	-1903.21	-1905.77	-1905.19	-1903.16	-1903.2	-1905.76	-1905.18	-1902.92	-1902.96	-1905.53	-1904.94	-1903.28	-1903.33	-1905.88	-1905.31
C50_038	-1903.13	-1903.16	-1905.73	-1905.14	-1903.11	-1903.15	-1905.71	-1905.13	-1902.87	-1902.91	-1905.48	-1904.89	-1903.24	-1903.28	-1905.84	-1905.26
C50_039	-1903.2	-1903.24	-1905.8	-1905.22	-1903.18	-1903.23	-1905.79	-1905.21	-1902.95	-1902.99	-1905.56	-1904.98	-1903.31	-1903.36	-1905.91	-1905.34
C50_040	-1903.21	-1903.26	-1905.82	-1905.24	-1903.2	-1903.25	-1905.81	-1905.23	-1902.96	-1903	-1905.57	-1904.99	-1903.33	-1903.38	-1905.93	-1905.36
C50_041	-1903.15	-1903.2	-1905.76	-1905.17	-1903.14	-1903.18	-1905.74	-1905.16	-1902.9	-1902.94	-1905.51	-1904.92	-1903.27	-1903.31	-1905.87	-1905.29
C50_042	-1903.21	-1903.26	-1905.82	-1905.24	-1903.21	-1903.26	-1905.81	-1905.24	-1902.97	-1903.01	-1905.58	-1905	-1903.33	-1903.39	-1905.93	-1905.36
C50_043	-1903.14	-1903.19	-1905.75	-1905.16	-1903.13	-1903.17	-1905.74	-1905.15	-1902.89	-1902.93	-1905.5	-1904.91	-1903.26	-1903.31	-1905.86	-1905.28
C50_044	-1903.19	-1903.23	-1905.79	-1905.21	-1903.19	-1903.24	-1905.8	-1905.23	-1902.95	-1902.99	-1905.55	-1904.97	-1903.31	-1903.36	-1905.91	-1905.34
C50_045	-1903.14	-1903.18	-1905.75	-1905.16	-1903.13	-1903.17	-1905.73	-1905.15	-1902.89	-1902.93	-1905.5	-1904.91	-1903.26	-1903.31	-1905.86	-1905.28
C50_046	-1903.12	-1903.16	-1905.72	-1905.14	-1903.1	-1903.14	-1905.71	-1905.12	-1902.86	-1902.9	-1905.47	-1904.88	-1903.24	-1903.28	-1905.84	-1905.26
C50_047	-1903.18	-1903.23	-1905.79	-1905.21	-1903.17	-1903.22	-1905.78	-1905.2	-1902.93	-1902.97	-1905.54	-1904.95	-1903.31	-1903.35	-1905.91	-1905.33
C50_048	-1903.14	-1903.18	-1905.74	-1905.16	-1903.13	-1903.17	-1905.73	-1905.15	-1902.89	-1902.92	-1905.49	-1904.9	-1903.26	-1903.3	-1905.86	-1905.28
C50_049	-1903.18	-1903.22	-1905.78	-1905.2	-1903.17	-1903.22	-1905.78	-1905.2	-1902.92	-1902.97	-1905.53	-1904.95	-1903.3	-1903.35	-1905.9	-1905.33
C50_050	-1903.12	-1903.16	-1905.72	-1905.14	-1903.11	-1903.15	-1905.71	-1905.13	-1902.86	-1902.9	-1905.47	-1904.88	-1903.24	-1903.29	-1905.84	-1905.26
C50_051	-1903.19	-1903.24	-1905.8	-1905.22	-1903.19	-1903.23	-1905.79	-1905.21	-1902.95	-1902.99	-1905.55	-1904.97	-1903.31	-1903.37	-1905.92	-1905.34
C50_052	-1903.23	-1903.28	-1905.83	-1905.26	-1903.21	-1903.26	-1905.82	-1905.24	-1902.97	-1903.02	-1905.58	-1905	-1903.34	-1903.4	-1905.95	-1905.37
C50_053	-1903.19	-1903.23	-1905.79	-1905.21	-1903.18	-1903.22	-1905.78	-1905.2	-1902.94	-1902.98	-1905.54	-1904.96	-1903.3	-1903.35	-1905.9	-1905.33
C50_054	-1903.18	-1903.23	-1905.79	-1905.21	-1903.18	-1903.23	-1905.78	-1905.21	-1902.93	-1902.97	-1905.54	-1904.96	-1903.31	-1903.36	-1905.91	-1905.33
C50_055	-1903.23	-1903.27	-1905.83	-1905.25	-1903.22	-1903.27	-1905.82	-1905.25	-1902.97	-1903.02	-1905.58	-1905	-1903.35	-1903.4	-1905.95	-1905.37
C50_056	-1903.08	-1903.1	-1905.68	-1905.08	-1903.07	-1903.11	-1905.67	-1905.08	-1902.82	-1902.85	-1905.43	-1904.83	-1903.2	-1903.24	-1905.8	-1905.21
C50_057	-1903.17	-1903.21	-1905.78	-1905.19	-1903.17	-1903.21	-1905.77	-1905.19	-1902.92	-1902.96	-1905.53	-1904.94	-1903.3	-1903.34	-1905.9	-1905.32
C50_058	-1903.2	-1903.24	-1905.8	-1905.22	-1903.19	-1903.24	-1905.8	-1905.22	-1902.95	-1902.99	-1905.55	-1904.97	-1903.32	-1903.37	-1905.92	-1905.34
C50_059	-1903.15	-1903.19	-1905.75	-1905.17	-1903.15	-1903.19	-1905.75	-1905.17	-1902.9	-1902.93	-1905.5	-1904.91	-1903.28	-1903.32	-1905.88	-1905.3
C50_060	-1903.11	-1903.14	-1905.71	-1905.12	-1903.1	-1903.13	-1905.7	-1905.11	-1902.86	-1902.89	-1905.46	-1904.87	-1903.23	-1903.27	-1905.83	-1905.25
C50_061	-1903.07	-1903.11	-1905.68	-1905.08	-1903.06	-1903.1	-1905.67	-1905.08	-1902.83	-1902.86	-1905.43	-1904.84	-1903.19	-1903.23	-1905.78	-1905.2
C50_062	-1903.17	-1903.21	-1905.78	-1905.19	-1903.16	-1903.21	-1905.77	-1905.19	-1902.92	-1902.96	-1905.53	-1904.94	-1903.29	-1903.34	-1905.89	-1905.32
C50_063	-1903.13	-1903.18	-1905.74	-1905.16	-1903.12	-1903.16	-1905.72	-1905.14	-1902.88	-1902.92	-1905.49	-1904.9	-1903.25	-1903.3	-1905.85	-1905.27
C50_064	-1903.14	-1903.18	-1905.74	-1905.16	-1903.11	-1903.15	-1905.71	-1905.13	-1902.88	-1902.91	-1905.48	-1904.89	-1903.25	-1903.3	-1905.85	-1905.27
C50_065	-1903.15	-1903.19	-1905.75	-1905.17	-1903.14	-1903.19	-1905.75	-1905.17	-1902.89	-1902.93	-1905.5	-1904.92	-1903.28	-1903.33	-1905.88	-1905.3
C50_066	-1903.16	-1903.2	-1905.76	-1905.18	-1903.15	-1903.19	-1905.75	-1905.17	-1902.91	-1902.95	-1905.51	-1904.93	-1903.28	-1903.32	-1905.88	-1905.3
C50_067	-1903.11	-1903.15	-1905.72	-1905.13	-1903.12	-1903.15	-1905.72	-1905.13	-1902.87	-1902.9	-1905.47	-1904.88	-1903.25	-1903.29	-1905.85	-1905.26
C50_068	-1903.19	-1903.24	-1905.8	-1905.22	-1903.18	-1903.23	-1905.78	-1905.21	-1902.94	-1902.98	-1905.54	-1904.96	-1903.31	-1903.36	-1905.91	-1905.34
C50_069	-1903.2	-1903.25	-1905.81	-1905.23	-1903.2	-1903.24	-1905.8	-1905.22	-1902.96	-1903	-1905.56	-1904.98	-1903.32	-1903.38	-1905.93	-1905.35
C50_070	-1903.2	-1903.25	-1905.81	-1905.23	-1903.19	-1903.23	-1905.79	-1905.21	-1902.95	-1902.99	-1905.56	-1904.98	-1903.32	-1903.37	-1905.92	-1905.34
C50_071	-1903.13	-1903.17	-1905.74	-1905.15	-1903.12	-1903.16	-1905.73	-1905.14	-1902.89	-1902.92	-1905.49	-1904.9	-1903.25	-1903.29	-1905.85	-1905.27
C50_072	-1903.2	-1903.25	-1905.8	-1905.22	-1903.19	-1903.23	-1905.79	-1905.22	-1902.94	-1902.99	-1905.55	-1904.97	-1903.32	-1903.37	-1905.92	-1905.35
C50_073	-1903.14	-1903.18	-1905.74	-1905.16	-1903.12	-1903.17	-1905.73	-1905.15	-1902.88	-1902.92	-1905.49	-1904.9	-1903.26	-1903.3	-1905.86	-1905.28
C50_074	-1903.18	-1903.22	-1905.78	-1905.2	-1903.17	-1903.21	-1905.77	-1905.19	-1902.92	-1902.96	-1905.53	-1904.94	-1903.3	-1903.35	-1905.91	-1905.33
C50_075	-1903.18	-1903.22	-1905.78	-1905.2	-1903.17	-1903.21	-1905.77	-1905.19	-1902.92	-1902.97	-1905.53	-1904.95	-1903.3	-1903.35	-1905.9	-1905.32
C50_076	-1903.15	-1903.19	-1905.76	-1905.17	-1903.14	-1903.18	-1905.74	-1905.16	-1902.9	-1902.94	-1905.51	-1904.92	-1903.27	-1903.31	-1905.87	-1905.29
C50_077	-1903.18	-1903.23	-1905.79	-1905.2	-1903.17	-1903.22	-1905.77	-1905.2	-1902.93	-1902.97	-1905.54	-1904.95	-1903.3	-1903.35	-1905.91	-1905.33
C50_078	-1903.1	-1903.13	-1905.7	-1905.11	-1903.09	-1903.13	-1905.7	-1905.11	-1902.84	-1902.87	-1905.45	-1904.85	-1903.23	-1903.27	-1905.83	-1905.25
C50_079	-1903.11	-1903.15	-1905.72	-1905.13	-1903.1	-1903.13	-1905.7	-1905.11	-1902.86	-1902.89	-1905.46	-1904.87	-1903.23	-1903.27	-1905.83	-1905.25
C50_080	-1903.12	-1903.16	-1905.73	-1905.13	-1903.12	-1903.17	-1905.73	-1905.15	-1902.87	-1902.9	-1905.47	-1904.89	-1903.26	-1903.3	-1905.86	-1905.28
C50_081	-1903.15	-1903.2	-1905.76	-1905.17	-1903.14	-1903.18	-1905.74	-1905.16	-1902.9	-1902.93	-1905.5	-1904.91	-1903.28	-1903.32	-1905.88	-1905.3
C50_082	-1903.18	-1903.23	-1905.79	-1905.21	-1903.17	-1903.22	-1905.78	-1905.2	-1902.93	-1902.97	-1905.53	-1904.95	-1903.31	-1903.36	-1905.91	-1905.33
C50_083	-1903.2	-1903.25	-1905.8	-1905.23	-1903.18	-1903.23	-1905.79	-1905.21	-1902.94	-1902.99	-1905.55	-1904.97	-1903.32	-1903.37	-1905.92	-1905.35
C50_084	-1903.14	-1903.17	-1905.74	-1905.15	-1903.13	-1903.17	-1905.74	-1905.15	-1902.88	-1902.92	-1905.49	-1904.9	-1903.27	-1903.31	-1905.87	-1905.29
C50_085	-1903.19	-1903.24	-1905.8	-1905.22	-1903.17	-1903.22	-1905.78	-1905.2	-1902.94	-1902.98	-1905.54	-1904.96	-1903.31	-1903.36	-1905.91	-1905.34
C50_086	-1903.14	-1903.18	-1905.74	-1905.15	-1903.12	-1903.15	-1905.72	-1905.13	-1902.88	-1902.92	-1905.49	-1904.9	-1903.25	-1903.3	-1905.85	-1905.27
C50_087	-1903.19	-1903.23	-1905.79	-1905.21	-1903.18	-1903.23	-1905.78	-1905.21	-1902.93	-1902.98	-1905.54	-1904.96	-1903.31	-1903.36	-1905.91	-1905.34
C50_088	-1903.23	-1903.28	-1905.83	-1905.26	-1903.21	-1903.26	-1905.82	-1905.24	-1902.97	-1903.02	-1905.58	-1905	-1903.34	-1903.4	-1905.95	-1905.37
C50_089	-1903.15	-1903.19	-1905.75	-1905.17	-1903.15	-1903.2	-1905.75	-1905.18	-1902.9	-1902.94	-1905.51	-1904.92	-1903.28	-1903.33	-1905.88	-1905.3
C50_090	-1903.15	-1903.19	-1905.76	-1905.17	-1903.15	-1903.2	-1905.76	-1905.18	-1902.91	-1902.94	-1905.51	-1904.92	-1903.28	-1903.33	-1905.88	-1905.3
C50_091	-1903.2	-1903.24	-1905.8	-1905.22	-1903.19	-1903.23	-1905.79	-1905.21	-1902.95	-1902.99	-1905.56	-1904.97	-1903.32	-1903.37	-1905.92	-1905.34
C50_092	-1903.17	-1903.21	-1905.77	-1905.18	-1903.16	-1903.21	-1905.77	-1905.19	-1902.92	-1902.96	-1905.52	-1904.94	-1903.3	-1903.34	-1905.9	-1905.32
C50_093	-1903.14	-1903.18	-1905.74	-1905.16	-1903.14	-1903.18	-1905.74	-1905.16	-1902.89	-1902.93	-1905.5	-1904.91	-1903.27	-1903.31	-1905.87	-1905.29
C50_094	-1903.14	-1903.18	-1905.74	-1905.16	-1903.13	-1903.17	-1905.73	-1905.15	-1902.89	-1902.92	-1905.49	-1904.91	-1903.26	-1903.31	-1905.86	-1905.28
C50_095	-1903.19	-1903.23	-1905.79	-1905.21	-1903.18	-1903.23	-1905.79	-1905.21	-1902.93	-1902.97	-1905.54	-1904.95	-1903.32	-1903.36	-1905.92	-1905.34
C50_096	-1903.17	-1903.22	-1905.78	-1905.19	-1903.18	-1903.23	-1905.79	-1905.21	-1902.93	-1902.97	-1905.54	-1904.95	-1903.31	-1903.36	-1905.91	-1905.33
C50_097	-1903.22	-1903.27	-1905.82	-1905.25	-1903.21	-1903.26	-1905.82	-1905.24	-1902.97	-1903.01	-1905.58	-1905	-1903.34	-1903.39	-1905.94	-1905.37
C50_098	-1903.25	-1903.3	-1905.86	-1905.28	-1903.25	-1903.31	-1905.86	-1905.29	-1903	-1903.05	-1905.61	-1905.04	-1903.38	-1903.44	-1905.98	-1905.41
C50_099	-1903.21	-1903.26	-1905.82	-1905.24	-1903.22	-1903.27	-1905.83	-1905.25	-1902.97	-1903.02	-1905.58	-1905	-1903.34	-1903.39	-1905.94	-1905.37
C50_100	-1903.24	-1903.29	-1905.84	-1905.26	-1903.25	-1903.3	-1905.85	-1905.29	-1902.99	-1903.04	-1905.6	-1905.02	-1903.37	-1903.42	-1905.97	-1905.4
C50_101	-1903.19	-1903.23	-1905.79	-1905.21	-1903.18	-1903.23	-1905.79	-1905.21	-1902.94	-1902.98	-1905.54	-1904.96	-1903.31	-1903.36	-1905.91	-1905.34
C50_102	-1903.22	-1903.27	-1905.83	-1905.25	-1903.21	-1903.26	-1905.82	-1905.24	-1902.97	-1903.01	-1905.58	-1905	-1903.34	-1903.39	-1905.95	-1905.37
C50_103	-1903.18	-1903.22	-1905.78	-1905.2	-1903.18	-1903.22	-1905.78	-1905.2	-1902.93	-1902.97	-1905.53	-1904.95	-1903.31	-1903.36	-1905.91	-1905.34
C50_104	-1903.24	-1903.29	-1905.85	-1905.27	-1903.24	-1903.3	-1905.85	-1905.28	-1902.99	-1903.04	-1905.6	-1905.02	-1903.37	-1903.43	-1905.98	-1905.41
C50_105	-1903.21	-1903.26	-1905.81	-1905.24	-1903.2	-1903.25	-1905.8	-1905.23	-1902.95	-1903	-1905.56	-1904.98	-1903.33	-1903.38	-1905.93	-1905.36
C50_106	-1903.23	-1903.28	-1905.84	-1905.26	-1903.22	-1903.27	-1905.83	-1905.25	-1902.98	-1903.02	-1905.59	-1905	-1903.35	-1903.41	-1905.95	-1905.38
C50_107	-1903.27	-1903.33	-1905.88	-1905.3	-1903.25	-1903.31	-1905.86	-1905.29	-1903.02	-1903.07	-1905.63	-1905.05	-1903.39	-1903.44	-1905.99	-1905.42
C50_108	-1903.24	-1903.29	-1905.85	-1905.27	-1903.22	-1903.27	-1905.83	-1905.25	-1902.99	-1903.03	-1905.6	-1905.02	-1903.36	-1903.41	-1905.96	-1905.38
C50_109	-1903.22	-1903.27	-1905.83	-1905.25	-1903.21	-1903.26	-1905.82	-1905.24	-1902.96	-1903.01	-1905.57	-1904.99	-1903.35	-1903.4	-1905.95	-1905.38
C50_110	-1903.24	-1903.28	-1905.84	-1905.26	-1903.22	-1903.27	-1905.83	-1905.25	-1902.98	-1903.02	-1905.59	-1905.01	-1903.35	-1903.41	-1905.96	-1905.38
C50_111	-1903.25	-1903.3	-1905.86	-1905.28	-1903.23	-1903.28	-1905.84	-1905.26	-1903	-1903.04	-1905.61	-1905.02	-1903.37	-1903.42	-1905.97	-1905.39
C50_112	-1903.19	-1903.23	-1905.79	-1905.21	-1903.18	-1903.23	-1905.79	-1905.21	-1902.94	-1902.98	-1905.55	-1904.96	-1903.31	-1903.36	-1905.91	-1905.34
C50_113	-1903.21	-1903.25	-1905.81	-1905.23	-1903.2	-1903.24	-1905.8	-1905.22	-1902.96	-1903	-1905.56	-1904.98	-1903.33	-1903.38	-1905.93	-1905.35
C50_114	-1903.25	-1903.3	-1905.85	-1905.28	-1903.23	-1903.28	-1905.83	-1905.26	-1902.99	-1903.04	-1905.6	-1905.02	-1903.36	-1903.41	-1905.96	-1905.39
C50_115	-1903.2	-1903.24	-1905.8	-1905.22	-1903.19	-1903.23	-1905.79	-1905.21	-1902.95	-1902.99	-1905.55	-1904.97	-1903.32	-1903.37	-1905.92	-1905.35
C50_116	-1903.16	-1903.2	-1905.76	-1905.18	-1903.14	-1903.18	-1905.74	-1905.16	-1902.9	-1902.94	-1905.5	-1904.92	-1903.27	-1903.32	-1905.87	-1905.3
C50_117	-1903.23	-1903.28	-1905.84	-1905.26	-1903.22	-1903.27	-1905.83	-1905.25	-1902.98	-1903.02	-1905.59	-1905	-1903.35	-1903.4	-1905.95	-1905.38
C50_118	-1903.22	-1903.26	-1905.82	-1905.24	-1903.21	-1903.26	-1905.82	-1905.24	-1902.97	-1903.01	-1905.58	-1904.99	-1903.34	-1903.39	-1905.94	-1905.37
C50_119	-1903.22	-1903.26	-1905.82	-1905.24	-1903.21	-1903.26	-1905.81	-1905.24	-1902.96	-1903	-1905.57	-1904.99	-1903.34	-1903.39	-1905.95	-1905.37
C50_120	-1903.18	-1903.23	-1905.79	-1905.21	-1903.17	-1903.21	-1905.77	-1905.19	-1902.93	-1902.97	-1905.53	-1904.95	-1903.3	-1903.35	-1905.9	-1905.33
C50_121	-1903.21	-1903.26	-1905.81	-1905.24	-1903.19	-1903.24	-1905.8	-1905.22	-1902.95	-1903	-1905.56	-1904.98	-1903.32	-1903.37	-1905.92	-1905.35
C50_122	-1903.22	-1903.27	-1905.82	-1905.25	-1903.19	-1903.24	-1905.79	-1905.22	-1902.95	-1902.99	-1905.56	-1904.98	-1903.33	-1903.39	-1905.93	-1905.36
C50_123	-1903.21	-1903.25	-1905.81	-1905.23	-1903.2	-1903.25	-1905.81	-1905.23	-1902.96	-1903	-1905.56	-1904.98	-1903.33	-1903.38	-1905.93	-1905.36
C50_124	-1903.19	-1903.24	-1905.8	-1905.21	-1903.18	-1903.22	-1905.78	-1905.2	-1902.93	-1902.97	-1905.54	-1904.96	-1903.32	-1903.37	-1905.92	-1905.34
C50_125	-1903.08	-1903.11	-1905.68	-1905.09	-1903.09	-1903.14	-1905.7	-1905.12	-1902.84	-1902.88	-1905.45	-1904.86	-1903.22	-1903.26	-1905.82	-1905.23
C50_126	-1903.13	-1903.18	-1905.74	-1905.15	-1903.13	-1903.18	-1905.74	-1905.16	-1902.88	-1902.92	-1905.49	-1904.9	-1903.26	-1903.31	-1905.86	-1905.29
C50_127	-1903.18	-1903.22	-1905.78	-1905.2	-1903.18	-1903.23	-1905.78	-1905.21	-1902.93	-1902.97	-1905.53	-1904.95	-1903.31	-1903.36	-1905.91	-1905.33
C50_128	-1903.16	-1903.2	-1905.76	-1905.18	-1903.15	-1903.2	-1905.76	-1905.18	-1902.9	-1902.94	-1905.51	-1904.93	-1903.29	-1903.33	-1905.89	-1905.31
C50_129	-1903.19	-1903.24	-1905.8	-1905.21	-1903.18	-1903.22	-1905.78	-1905.2	-1902.94	-1902.98	-1905.55	-1904.96	-1903.31	-1903.36	-1905.91	-1905.33
C50_130	-1903.18	-1903.22	-1905.78	-1905.2	-1903.17	-1903.22	-1905.78	-1905.2	-1902.93	-1902.97	-1905.54	-1904.95	-1903.3	-1903.35	-1905.9	-1905.33
C50_131	-1903.16	-1903.2	-1905.76	-1905.17	-1903.15	-1903.19	-1905.76	-1905.17	-1902.91	-1902.94	-1905.51	-1904.92	-1903.29	-1903.33	-1905.89	-1905.31
C50_132	-1903.21	-1903.26	-1905.81	-1905.24	-1903.19	-1903.24	-1905.8	-1905.22	-1902.95	-1903	-1905.56	-1904.98	-1903.32	-1903.37	-1905.93	-1905.35
C50_133	-1903.18	-1903.22	-1905.78	-1905.2	-1903.17	-1903.22	-1905.78	-1905.2	-1902.93	-1902.97	-1905.54	-1904.95	-1903.3	-1903.35	-1905.9	-1905.33
C50_134	-1903.14	-1903.18	-1905.74	-1905.16	-1903.13	-1903.17	-1905.73	-1905.15	-1902.89	-1902.93	-1905.49	-1904.91	-1903.26	-1903.3	-1905.86	-1905.28
C50_135	-1903.15	-1903.19	-1905.75	-1905.17	-1903.14	-1903.18	-1905.74	-1905.16	-1902.9	-1902.94	-1905.51	-1904.92	-1903.27	-1903.32	-1905.87	-1905.29
C50_136	-1903.14	-1903.18	-1905.74	-1905.16	-1903.12	-1903.16	-1905.72	-1905.14	-1902.87	-1902.91	-1905.48	-1904.89	-1903.26	-1903.31	-1905.86	-1905.28
C50_137	-1903.17	-1903.21	-1905.77	-1905.19	-1903.16	-1903.21	-1905.77	-1905.19	-1902.92	-1902.96	-1905.52	-1904.94	-1903.29	-1903.34	-1905.89	-1905.32
C50_138	-1903.04	-1903.06	-1905.64	-1905.04	-1903.04	-1903.08	-1905.64	-1905.05	-1902.78	-1902.81	-1905.39	-1904.79	-1903.17	-1903.21	-1905.77	-1905.18
C50_139	-1903.11	-1903.15	-1905.71	-1905.12	-1903.1	-1903.15	-1905.71	-1905.13	-1902.86	-1902.9	-1905.47	-1904.88	-1903.23	-1903.28	-1905.83	-1905.25
C50_140	-1903.11	-1903.15	-1905.72	-1905.13	-1903.11	-1903.16	-1905.72	-1905.14	-1902.86	-1902.9	-1905.47	-1904.88	-1903.24	-1903.29	-1905.84	-1905.26
C50_141	-1903.1	-1903.14	-1905.7	-1905.12	-1903.09	-1903.13	-1905.69	-1905.11	-1902.84	-1902.88	-1905.45	-1904.86	-1903.22	-1903.27	-1905.82	-1905.24
C50_142	-1903.15	-1903.2	-1905.75	-1905.17	-1903.14	-1903.18	-1905.75	-1905.16	-1902.9	-1902.94	-1905.51	-1904.92	-1903.27	-1903.32	-1905.87	-1905.3
C50_143	-1903.23	-1903.28	-1905.84	-1905.26	-1903.22	-1903.26	-1905.82	-1905.24	-1902.99	-1903.03	-1905.59	-1905.01	-1903.35	-1903.4	-1905.95	-1905.37
C50_144	-1903.23	-1903.28	-1905.83	-1905.25	-1903.23	-1903.28	-1905.83	-1905.26	-1902.98	-1903.03	-1905.59	-1905.01	-1903.36	-1903.41	-1905.96	-1905.39
C50_145	-1903.2	-1903.25	-1905.81	-1905.23	-1903.19	-1903.24	-1905.79	-1905.22	-1902.95	-1902.99	-1905.56	-1904.97	-1903.32	-1903.37	-1905.92	-1905.35
C50_146	-1903.22	-1903.27	-1905.83	-1905.25	-1903.22	-1903.26	-1905.82	-1905.25	-1902.98	-1903.02	-1905.59	-1905.01	-1903.34	-1903.39	-1905.94	-1905.37
C50_147	-1903.18	-1903.23	-1905.79	-1905.21	-1903.16	-1903.21	-1905.77	-1905.19	-1902.93	-1902.97	-1905.54	-1904.95	-1903.3	-1903.35	-1905.9	-1905.32
C50_148	-1903.13	-1903.16	-1905.73	-1905.14	-1903.11	-1903.16	-1905.72	-1905.14	-1902.87	-1902.91	-1905.47	-1904.89	-1903.25	-1903.3	-1905.85	-1905.27
C50_149	-1903.2	-1903.24	-1905.8	-1905.22	-1903.19	-1903.24	-1905.8	-1905.22	-1902.95	-1902.99	-1905.55	-1904.97	-1903.33	-1903.37	-1905.93	-1905.35
C50_150	-1903.23	-1903.28	-1905.83	-1905.25	-1903.23	-1903.28	-1905.84	-1905.26	-1902.98	-1903.03	-1905.59	-1905.01	-1903.35	-1903.41	-1905.96	-1905.39
C50_151	-1903.21	-1903.26	-1905.82	-1905.24	-1903.21	-1903.25	-1905.81	-1905.23	-1902.97	-1903.01	-1905.58	-1904.99	-1903.34	-1903.39	-1905.94	-1905.36
C50_152	-1903.19	-1903.23	-1905.79	-1905.21	-1903.18	-1903.23	-1905.78	-1905.21	-1902.93	-1902.97	-1905.54	-1904.95	-1903.31	-1903.36	-1905.92	-1905.34
C50_153	-1903.22	-1903.27	-1905.83	-1905.25	-1903.2	-1903.25	-1905.8	-1905.23	-1902.97	-1903.01	-1905.57	-1905	-1903.33	-1903.39	-1905.94	-1905.36
C50_154	-1903.21	-1903.25	-1905.81	-1905.23	-1903.19	-1903.23	-1905.79	-1905.21	-1902.95	-1902.99	-1905.56	-1904.98	-1903.32	-1903.37	-1905.92	-1905.35
C50_155	-1903.15	-1903.19	-1905.75	-1905.17	-1903.14	-1903.18	-1905.74	-1905.16	-1902.9	-1902.94	-1905.5	-1904.92	-1903.27	-1903.32	-1905.87	-1905.29
C50_156	-1903.18	-1903.21	-1905.78	-1905.19	-1903.18	-1903.23	-1905.79	-1905.21	-1902.93	-1902.97	-1905.54	-1904.95	-1903.31	-1903.36	-1905.91	-1905.33
C50_157	-1903.18	-1903.22	-1905.78	-1905.19	-1903.15	-1903.19	-1905.75	-1905.17	-1902.92	-1902.96	-1905.52	-1904.94	-1903.29	-1903.33	-1905.89	-1905.31
C50_158	-1903.22	-1903.27	-1905.83	-1905.25	-1903.2	-1903.25	-1905.8	-1905.23	-1902.96	-1903.01	-1905.57	-1904.99	-1903.34	-1903.39	-1905.94	-1905.36
C50_159	-1903.17	-1903.21	-1905.78	-1905.19	-1903.17	-1903.22	-1905.78	-1905.21	-1902.92	-1902.96	-1905.53	-1904.95	-1903.3	-1903.35	-1905.9	-1905.33
C50_160	-1903.2	-1903.24	-1905.8	-1905.22	-1903.19	-1903.24	-1905.8	-1905.22	-1902.95	-1902.99	-1905.56	-1904.97	-1903.32	-1903.37	-1905.92	-1905.35
C50_161	-1903.17	-1903.21	-1905.77	-1905.19	-1903.15	-1903.2	-1905.76	-1905.18	-1902.91	-1902.95	-1905.51	-1904.93	-1903.29	-1903.34	-1905.89	-1905.32
C50_162	-1903.16	-1903.21	-1905.77	-1905.19	-1903.15	-1903.19	-1905.75	-1905.17	-1902.91	-1902.95	-1905.51	-1904.93	-1903.28	-1903.33	-1905.88	-1905.31
C50_163	-1903.22	-1903.27	-1905.82	-1905.25	-1903.21	-1903.26	-1905.82	-1905.24	-1902.96	-1903.01	-1905.57	-1904.99	-1903.35	-1903.4	-1905.95	-1905.38
C50_164	-1903.14	-1903.18	-1905.74	-1905.16	-1903.13	-1903.18	-1905.73	-1905.16	-1902.88	-1902.92	-1905.49	-1904.91	-1903.27	-1903.31	-1905.87	-1905.29
C50_165	-1903.22	-1903.27	-1905.83	-1905.25	-1903.21	-1903.26	-1905.82	-1905.24	-1902.97	-1903.01	-1905.58	-1904.99	-1903.35	-1903.4	-1905.95	-1905.38
C50_166	-1903.23	-1903.28	-1905.83	-1905.26	-1903.2	-1903.25	-1905.81	-1905.23	-1902.97	-1903.01	-1905.57	-1904.99	-1903.34	-1903.4	-1905.95	-1905.37
C50_167	-1903.21	-1903.26	-1905.82	-1905.24	-1903.2	-1903.24	-1905.8	-1905.22	-1902.96	-1902.99	-1905.56	-1904.98	-1903.33	-1903.38	-1905.93	-1905.36
C50_168	-1903.21	-1903.25	-1905.81	-1905.23	-1903.21	-1903.26	-1905.82	-1905.24	-1902.96	-1903	-1905.57	-1904.99	-1903.33	-1903.39	-1905.94	-1905.36
C50_169	-1903.24	-1903.29	-1905.84	-1905.26	-1903.23	-1903.28	-1905.84	-1905.26	-1902.99	-1903.03	-1905.6	-1905.01	-1903.36	-1903.41	-1905.96	-1905.39
C50_170	-1903.25	-1903.3	-1905.86	-1905.28	-1903.25	-1903.3	-1905.85	-1905.28	-1903	-1903.05	-1905.61	-1905.03	-1903.37	-1903.43	-1905.98	-1905.4
C50_171	-1903.24	-1903.28	-1905.84	-1905.26	-1903.22	-1903.27	-1905.83	-1905.25	-1902.99	-1903.03	-1905.59	-1905.01	-1903.35	-1903.4	-1905.95	-1905.38
C50_172	-1903.26	-1903.31	-1905.87	-1905.29	-1903.24	-1903.29	-1905.85	-1905.27	-1903	-1903.05	-1905.61	-1905.03	-1903.38	-1903.43	-1905.98	-1905.41
C50_173	-1903.27	-1903.32	-1905.87	-1905.3	-1903.25	-1903.3	-1905.86	-1905.28	-1903.01	-1903.06	-1905.62	-1905.04	-1903.38	-1903.44	-1905.99	-1905.42
C50_174	-1903.22	-1903.27	-1905.83	-1905.25	-1903.21	-1903.26	-1905.82	-1905.24	-1902.97	-1903.01	-1905.58	-1905	-1903.34	-1903.39	-1905.94	-1905.37
C50_175	-1903.11	-1903.14	-1905.71	-1905.12	-1903.09	-1903.13	-1905.69	-1905.1	-1902.85	-1902.88	-1905.45	-1904.86	-1903.23	-1903.27	-1905.83	-1905.24
C50_176	-1903.19	-1903.23	-1905.79	-1905.21	-1903.17	-1903.22	-1905.78	-1905.2	-1902.94	-1902.98	-1905.54	-1904.96	-1903.31	-1903.35	-1905.91	-1905.33
C50_177	-1903.25	-1903.31	-1905.86	-1905.29	-1903.24	-1903.29	-1905.84	-1905.27	-1902.99	-1903.04	-1905.6	-1905.02	-1903.37	-1903.43	-1905.97	-1905.4
C50_178	-1903.22	-1903.27	-1905.83	-1905.24	-1903.21	-1903.26	-1905.82	-1905.24	-1902.97	-1903.01	-1905.58	-1904.99	-1903.34	-1903.39	-1905.94	-1905.37
C50_179	-1903.22	-1903.27	-1905.82	-1905.24	-1903.21	-1903.26	-1905.81	-1905.24	-1902.96	-1903.01	-1905.57	-1904.99	-1903.34	-1903.39	-1905.94	-1905.37
C50_180	-1903.17	-1903.21	-1905.78	-1905.19	-1903.15	-1903.18	-1905.75	-1905.16	-1902.91	-1902.94	-1905.52	-1904.93	-1903.29	-1903.33	-1905.89	-1905.31
C50_181	-1903.22	-1903.26	-1905.82	-1905.24	-1903.21	-1903.26	-1905.82	-1905.24	-1902.96	-1903	-1905.57	-1904.99	-1903.34	-1903.39	-1905.95	-1905.37
C50_182	-1903.26	-1903.31	-1905.86	-1905.29	-1903.26	-1903.31	-1905.86	-1905.29	-1903.01	-1903.05	-1905.62	-1905.03	-1903.38	-1903.44	-1905.99	-1905.42
C50_183	-1903.26	-1903.31	-1905.87	-1905.29	-1903.26	-1903.31	-1905.87	-1905.29	-1903.02	-1903.06	-1905.63	-1905.05	-1903.39	-1903.44	-1905.99	-1905.42
C50_184	-1903.27	-1903.32	-1905.87	-1905.3	-1903.26	-1903.31	-1905.87	-1905.29	-1903.01	-1903.06	-1905.62	-1905.04	-1903.39	-1903.45	-1905.99	-1905.43
C50_185	-1903.18	-1903.22	-1905.79	-1905.2	-1903.18	-1903.22	-1905.78	-1905.2	-1902.93	-1902.97	-1905.54	-1904.95	-1903.3	-1903.35	-1905.91	-1905.33
C50_186	-1903.23	-1903.27	-1905.83	-1905.25	-1903.21	-1903.26	-1905.82	-1905.24	-1902.97	-1903.02	-1905.58	-1905	-1903.35	-1903.4	-1905.95	-1905.37
C50_187	-1903.25	-1903.3	-1905.85	-1905.28	-1903.23	-1903.28	-1905.83	-1905.26	-1902.99	-1903.03	-1905.6	-1905.02	-1903.36	-1903.42	-1905.97	-1905.39
C50_188	-1903.27	-1903.32	-1905.87	-1905.3	-1903.27	-1903.32	-1905.87	-1905.3	-1903.02	-1903.07	-1905.63	-1905.05	-1903.4	-1903.45	-1906	-1905.43
C50_189	-1903.26	-1903.31	-1905.87	-1905.29	-1903.25	-1903.31	-1905.86	-1905.29	-1903	-1903.05	-1905.61	-1905.03	-1903.39	-1903.44	-1905.99	-1905.42
C50_190	-1903.2	-1903.25	-1905.81	-1905.23	-1903.19	-1903.23	-1905.79	-1905.21	-1902.95	-1902.98	-1905.55	-1904.97	-1903.32	-1903.37	-1905.92	-1905.35
C50_191	-1903.21	-1903.26	-1905.82	-1905.24	-1903.2	-1903.25	-1905.81	-1905.23	-1902.96	-1903	-1905.57	-1904.98	-1903.34	-1903.39	-1905.94	-1905.37
C50_192	-1903.16	-1903.2	-1905.77	-1905.18	-1903.15	-1903.2	-1905.76	-1905.18	-1902.91	-1902.95	-1905.52	-1904.93	-1903.29	-1903.33	-1905.89	-1905.31
C50_193	-1903.21	-1903.26	-1905.81	-1905.24	-1903.2	-1903.25	-1905.8	-1905.23	-1902.95	-1903	-1905.56	-1904.98	-1903.33	-1903.38	-1905.93	-1905.36
C50_194	-1903.22	-1903.27	-1905.83	-1905.25	-1903.22	-1903.27	-1905.82	-1905.25	-1902.97	-1903.02	-1905.58	-1905	-1903.35	-1903.4	-1905.95	-1905.38
C50_195	-1903.23	-1903.28	-1905.83	-1905.26	-1903.23	-1903.27	-1905.83	-1905.25	-1902.97	-1903.02	-1905.58	-1905	-1903.36	-1903.41	-1905.96	-1905.39
C50_196	-1903.2	-1903.25	-1905.81	-1905.23	-1903.2	-1903.25	-1905.81	-1905.23	-1902.95	-1903	-1905.56	-1904.98	-1903.33	-1903.38	-1905.93	-1905.36
C50_197	-1903.2	-1903.24	-1905.8	-1905.22	-1903.19	-1903.24	-1905.79	-1905.21	-1902.94	-1902.99	-1905.55	-1904.97	-1903.32	-1903.37	-1905.92	-1905.34
C50_198	-1903.22	-1903.26	-1905.82	-1905.24	-1903.21	-1903.26	-1905.82	-1905.25	-1902.97	-1903.01	-1905.58	-1904.99	-1903.34	-1903.4	-1905.95	-1905.37
C50_199	-1903.28	-1903.34	-1905.89	-1905.32	-1903.26	-1903.31	-1905.86	-1905.29	-1903.02	-1903.07	-1905.63	-1905.05	-1903.4	-1903.45	-1906	-1905.43
C50_200	-1903.29	-1903.34	-1905.89	-1905.32	-1903.26	-1903.32	-1905.87	-1905.3	-1903.03	-1903.07	-1905.64	-1905.06	-1903.4	-1903.46	-1906.01	-1905.44
C50_201	-1903.26	-1903.32	-1905.87	-1905.29	-1903.25	-1903.31	-1905.86	-1905.29	-1903.01	-1903.05	-1905.61	-1905.03	-1903.39	-1903.45	-1905.99	-1905.43
C50_202	-1903.27	-1903.33	-1905.88	-1905.31	-1903.25	-1903.3	-1905.86	-1905.29	-1903.02	-1903.07	-1905.63	-1905.05	-1903.39	-1903.44	-1905.99	-1905.42
C50_203	-1903.25	-1903.29	-1905.85	-1905.27	-1903.23	-1903.28	-1905.83	-1905.26	-1902.99	-1903.03	-1905.59	-1905.01	-1903.37	-1903.42	-1905.97	-1905.4
C50_204	-1903.21	-1903.26	-1905.82	-1905.24	-1903.21	-1903.26	-1905.82	-1905.24	-1902.96	-1903	-1905.57	-1904.99	-1903.34	-1903.4	-1905.95	-1905.37
C50_205	-1903.21	-1903.26	-1905.82	-1905.24	-1903.2	-1903.24	-1905.81	-1905.22	-1902.97	-1903.01	-1905.58	-1904.99	-1903.32	-1903.37	-1905.93	-1905.35
C50_206	-1903.23	-1903.28	-1905.84	-1905.26	-1903.22	-1903.27	-1905.83	-1905.25	-1902.98	-1903.02	-1905.59	-1905.01	-1903.35	-1903.41	-1905.95	-1905.38
C50_207	-1903.25	-1903.3	-1905.86	-1905.28	-1903.22	-1903.27	-1905.83	-1905.25	-1903	-1903.04	-1905.61	-1905.03	-1903.36	-1903.41	-1905.96	-1905.39
C50_208	-1903.27	-1903.32	-1905.88	-1905.3	-1903.25	-1903.3	-1905.85	-1905.28	-1903.01	-1903.05	-1905.62	-1905.04	-1903.39	-1903.44	-1905.99	-1905.42
C50_209	-1903.21	-1903.25	-1905.81	-1905.23	-1903.21	-1903.27	-1905.82	-1905.25	-1902.96	-1903	-1905.56	-1904.99	-1903.34	-1903.39	-1905.94	-1905.37
C50_210	-1903.19	-1903.22	-1905.79	-1905.2	-1903.19	-1903.23	-1905.79	-1905.21	-1902.95	-1902.98	-1905.55	-1904.96	-1903.3	-1903.35	-1905.9	-1905.33
C50_211	-1903.23	-1903.28	-1905.84	-1905.26	-1903.23	-1903.29	-1905.84	-1905.27	-1902.98	-1903.03	-1905.59	-1905.01	-1903.36	-1903.41	-1905.96	-1905.39
C50_212	-1903.19	-1903.24	-1905.79	-1905.22	-1903.17	-1903.22	-1905.78	-1905.21	-1902.93	-1902.98	-1905.54	-1904.96	-1903.31	-1903.36	-1905.91	-1905.34
C50_213	-1903.21	-1903.26	-1905.82	-1905.24	-1903.2	-1903.25	-1905.8	-1905.23	-1902.96	-1903	-1905.57	-1904.98	-1903.33	-1903.39	-1905.93	-1905.36
C50_214	-1903.27	-1903.32	-1905.88	-1905.3	-1903.24	-1903.29	-1905.84	-1905.27	-1903.01	-1903.06	-1905.62	-1905.04	-1903.37	-1903.43	-1905.98	-1905.4
C50_215	-1903.21	-1903.26	-1905.82	-1905.24	-1903.19	-1903.23	-1905.79	-1905.21	-1902.95	-1903	-1905.56	-1904.98	-1903.32	-1903.37	-1905.93	-1905.35
C50_216	-1903.25	-1903.3	-1905.86	-1905.28	-1903.24	-1903.29	-1905.84	-1905.27	-1903	-1903.04	-1905.61	-1905.03	-1903.37	-1903.43	-1905.97	-1905.4
C50_217	-1903.26	-1903.31	-1905.86	-1905.28	-1903.24	-1903.29	-1905.85	-1905.28	-1903	-1903.05	-1905.61	-1905.03	-1903.37	-1903.43	-1905.97	-1905.4
C50_218	-1903.27	-1903.32	-1905.88	-1905.3	-1903.25	-1903.29	-1905.85	-1905.27	-1903.01	-1903.06	-1905.62	-1905.04	-1903.38	-1903.44	-1905.98	-1905.41
C50_219	-1903.25	-1903.3	-1905.86	-1905.28	-1903.25	-1903.31	-1905.86	-1905.29	-1903.01	-1903.05	-1905.62	-1905.04	-1903.38	-1903.43	-1905.98	-1905.41
C50_220	-1903.22	-1903.27	-1905.82	-1905.25	-1903.22	-1903.27	-1905.83	-1905.25	-1902.97	-1903.02	-1905.58	-1905	-1903.34	-1903.4	-1905.95	-1905.37
C50_221	-1903.28	-1903.34	-1905.89	-1905.32	-1903.28	-1903.34	-1905.89	-1905.32	-1903.04	-1903.09	-1905.65	-1905.07	-1903.41	-1903.47	-1906.01	-1905.45
C50_222	-1903.29	-1903.35	-1905.9	-1905.33	-1903.28	-1903.33	-1905.88	-1905.31	-1903.04	-1903.09	-1905.65	-1905.07	-1903.41	-1903.47	-1906.01	-1905.44
C50_223	-1903.25	-1903.3	-1905.86	-1905.28	-1903.24	-1903.29	-1905.85	-1905.27	-1903	-1903.05	-1905.61	-1905.03	-1903.37	-1903.42	-1905.97	-1905.4
C50_224	-1903.25	-1903.3	-1905.86	-1905.28	-1903.24	-1903.29	-1905.84	-1905.27	-1903	-1903.05	-1905.61	-1905.03	-1903.37	-1903.42	-1905.97	-1905.4
C50_225	-1903.28	-1903.34	-1905.89	-1905.32	-1903.27	-1903.33	-1905.88	-1905.31	-1903.03	-1903.08	-1905.64	-1905.06	-1903.4	-1903.46	-1906	-1905.44
C50_226	-1903.3	-1903.35	-1905.9	-1905.33	-1903.26	-1903.32	-1905.87	-1905.3	-1903.03	-1903.08	-1905.64	-1905.06	-1903.4	-1903.46	-1906.01	-1905.44
C50_227	-1903.2	-1903.24	-1905.8	-1905.22	-1903.19	-1903.25	-1905.8	-1905.23	-1902.95	-1902.99	-1905.56	-1904.97	-1903.32	-1903.37	-1905.93	-1905.35
C50_228	-1903.19	-1903.23	-1905.79	-1905.21	-1903.18	-1903.23	-1905.78	-1905.21	-1902.93	-1902.98	-1905.54	-1904.96	-1903.31	-1903.36	-1905.91	-1905.34
C50_229	-1903.23	-1903.27	-1905.83	-1905.25	-1903.22	-1903.27	-1905.83	-1905.25	-1902.98	-1903.02	-1905.59	-1905.01	-1903.35	-1903.4	-1905.95	-1905.38
C50_230	-1903.22	-1903.26	-1905.82	-1905.24	-1903.2	-1903.25	-1905.81	-1905.23	-1902.96	-1903.01	-1905.57	-1904.99	-1903.33	-1903.38	-1905.93	-1905.36
C50_231	-1903.22	-1903.27	-1905.83	-1905.25	-1903.22	-1903.27	-1905.82	-1905.25	-1902.98	-1903.02	-1905.59	-1905	-1903.34	-1903.39	-1905.94	-1905.37
C50_232	-1903.15	-1903.19	-1905.76	-1905.17	-1903.14	-1903.19	-1905.75	-1905.17	-1902.9	-1902.94	-1905.51	-1904.92	-1903.27	-1903.32	-1905.87	-1905.3
C50_233	-1903.25	-1903.3	-1905.85	-1905.28	-1903.24	-1903.29	-1905.85	-1905.28	-1903	-1903.04	-1905.61	-1905.03	-1903.37	-1903.42	-1905.97	-1905.4
C50_234	-1903.2	-1903.24	-1905.8	-1905.22	-1903.17	-1903.22	-1905.78	-1905.2	-1902.94	-1902.98	-1905.55	-1904.96	-1903.31	-1903.36	-1905.91	-1905.34
C50_235	-1903.13	-1903.18	-1905.74	-1905.16	-1903.13	-1903.18	-1905.73	-1905.16	-1902.88	-1902.92	-1905.49	-1904.9	-1903.26	-1903.31	-1905.86	-1905.29
C50_236	-1903.2	-1903.25	-1905.81	-1905.23	-1903.19	-1903.24	-1905.8	-1905.22	-1902.95	-1903	-1905.56	-1904.98	-1903.32	-1903.37	-1905.92	-1905.35
C50_237	-1903.26	-1903.31	-1905.87	-1905.29	-1903.25	-1903.3	-1905.85	-1905.28	-1903.01	-1903.06	-1905.62	-1905.04	-1903.38	-1903.43	-1905.98	-1905.41
C50_238	-1903.19	-1903.24	-1905.8	-1905.22	-1903.17	-1903.21	-1905.77	-1905.19	-1902.93	-1902.97	-1905.54	-1904.95	-1903.3	-1903.36	-1905.91	-1905.33
C50_239	-1903.26	-1903.31	-1905.86	-1905.28	-1903.23	-1903.28	-1905.84	-1905.26	-1903	-1903.04	-1905.61	-1905.03	-1903.37	-1903.42	-1905.97	-1905.4
C50_240	-1903.27	-1903.32	-1905.88	-1905.3	-1903.26	-1903.31	-1905.87	-1905.29	-1903.02	-1903.07	-1905.63	-1905.05	-1903.39	-1903.45	-1906	-1905.43
C50_241	-1903.26	-1903.32	-1905.87	-1905.29	-1903.25	-1903.31	-1905.86	-1905.29	-1903.01	-1903.06	-1905.62	-1905.04	-1903.39	-1903.44	-1905.99	-1905.42
C50_242	-1903.22	-1903.26	-1905.82	-1905.24	-1903.22	-1903.27	-1905.83	-1905.25	-1902.98	-1903.02	-1905.59	-1905.01	-1903.33	-1903.39	-1905.94	-1905.36
C50_243	-1903.2	-1903.25	-1905.81	-1905.23	-1903.2	-1903.25	-1905.8	-1905.23	-1902.95	-1903	-1905.56	-1904.98	-1903.33	-1903.38	-1905.93	-1905.35
C50_244	-1903.23	-1903.28	-1905.83	-1905.26	-1903.23	-1903.28	-1905.84	-1905.27	-1902.98	-1903.03	-1905.59	-1905.01	-1903.36	-1903.41	-1905.96	-1905.39
C50_245	-1903.24	-1903.29	-1905.85	-1905.27	-1903.23	-1903.28	-1905.84	-1905.27	-1902.99	-1903.04	-1905.6	-1905.02	-1903.36	-1903.41	-1905.96	-1905.39
C50_246	-1903.3	-1903.35	-1905.91	-1905.33	-1903.29	-1903.34	-1905.89	-1905.33	-1903.04	-1903.09	-1905.65	-1905.08	-1903.42	-1903.48	-1906.02	-1905.46
C50_247	-1903.27	-1903.32	-1905.88	-1905.3	-1903.25	-1903.31	-1905.86	-1905.29	-1903.01	-1903.06	-1905.62	-1905.04	-1903.39	-1903.45	-1906	-1905.43
C50_248	-1903.3	-1903.35	-1905.91	-1905.34	-1903.29	-1903.34	-1905.89	-1905.32	-1903.04	-1903.09	-1905.66	-1905.08	-1903.42	-1903.48	-1906.02	-1905.46
C50_249	-1903.29	-1903.34	-1905.89	-1905.32	-1903.28	-1903.34	-1905.89	-1905.32	-1903.04	-1903.09	-1905.65	-1905.07	-1903.41	-1903.47	-1906.01	-1905.45
C50_250	-1903.27	-1903.32	-1905.88	-1905.3	-1903.26	-1903.31	-1905.87	-1905.29	-1903.02	-1903.06	-1905.63	-1905.04	-1903.39	-1903.45	-1906	-1905.42
C50_251	-1903.26	-1903.31	-1905.87	-1905.29	-1903.25	-1903.3	-1905.86	-1905.28	-1903.01	-1903.05	-1905.62	-1905.04	-1903.38	-1903.44	-1905.98	-1905.41
C50_252	-1903.25	-1903.3	-1905.86	-1905.28	-1903.25	-1903.31	-1905.86	-1905.29	-1903	-1903.05	-1905.61	-1905.04	-1903.38	-1903.43	-1905.98	-1905.41
C50_253	-1903.22	-1903.27	-1905.83	-1905.25	-1903.23	-1903.29	-1905.84	-1905.27	-1902.98	-1903.03	-1905.59	-1905.01	-1903.35	-1903.41	-1905.96	-1905.38
C50_254	-1903.24	-1903.29	-1905.85	-1905.27	-1903.24	-1903.29	-1905.85	-1905.27	-1902.99	-1903.03	-1905.6	-1905.02	-1903.37	-1903.42	-1905.97	-1905.4
C50_255	-1903.26	-1903.31	-1905.87	-1905.29	-1903.24	-1903.29	-1905.85	-1905.27	-1903	-1903.05	-1905.61	-1905.03	-1903.38	-1903.43	-1905.98	-1905.41
C50_256	-1903.26	-1903.32	-1905.87	-1905.3	-1903.24	-1903.29	-1905.85	-1905.27	-1903	-1903.05	-1905.61	-1905.03	-1903.38	-1903.43	-1905.98	-1905.41
C50_257	-1903.25	-1903.29	-1905.85	-1905.27	-1903.24	-1903.29	-1905.85	-1905.26	-1903	-1903.04	-1905.6	-1905.02	-1903.37	-1903.42	-1905.97	-1905.4
C50_258	-1903.19	-1903.23	-1905.79	-1905.21	-1903.19	-1903.24	-1905.8	-1905.22	-1902.94	-1902.98	-1905.55	-1904.96	-1903.32	-1903.37	-1905.92	-1905.35
C50_259	-1903.25	-1903.3	-1905.86	-1905.28	-1903.25	-1903.3	-1905.86	-1905.28	-1903	-1903.05	-1905.61	-1905.03	-1903.38	-1903.43	-1905.98	-1905.41
C50_260	-1903.33	-1903.39	-1905.94	-1905.37	-1903.31	-1903.37	-1905.92	-1905.35	-1903.07	-1903.13	-1905.68	-1905.11	-1903.45	-1903.51	-1906.05	-1905.49
C50_261	-1903.3	-1903.35	-1905.9	-1905.33	-1903.27	-1903.33	-1905.88	-1905.31	-1903.03	-1903.08	-1905.64	-1905.07	-1903.41	-1903.47	-1906.01	-1905.45
C50_262	-1903.33	-1903.39	-1905.93	-1905.37	-1903.31	-1903.36	-1905.92	-1905.34	-1903.07	-1903.12	-1905.68	-1905.1	-1903.45	-1903.51	-1906.05	-1905.49
C50_263	-1903.36	-1903.41	-1905.96	-1905.39	-1903.31	-1903.37	-1905.92	-1905.35	-1903.08	-1903.13	-1905.69	-1905.11	-1903.47	-1903.53	-1906.07	-1905.51
C50_264	-1903.34	-1903.39	-1905.94	-1905.37	-1903.31	-1903.38	-1905.92	-1905.36	-1903.07	-1903.12	-1905.68	-1905.11	-1903.46	-1903.52	-1906.06	-1905.5
C50_265	-1903.32	-1903.37	-1905.93	-1905.35	-1903.3	-1903.35	-1905.9	-1905.33	-1903.06	-1903.11	-1905.67	-1905.09	-1903.43	-1903.49	-1906.04	-1905.47
C50_266	-1903.35	-1903.41	-1905.96	-1905.39	-1903.32	-1903.38	-1905.93	-1905.37	-1903.09	-1903.14	-1905.7	-1905.12	-1903.46	-1903.53	-1906.07	-1905.51
C50_267	-1903.32	-1903.38	-1905.93	-1905.36	-1903.29	-1903.35	-1905.9	-1905.33	-1903.05	-1903.11	-1905.67	-1905.09	-1903.43	-1903.49	-1906.04	-1905.47
C50_268	-1903.31	-1903.37	-1905.92	-1905.35	-1903.29	-1903.35	-1905.9	-1905.33	-1903.06	-1903.11	-1905.67	-1905.09	-1903.43	-1903.49	-1906.03	-1905.47
C50_269	-1903.26	-1903.31	-1905.87	-1905.29	-1903.25	-1903.3	-1905.86	-1905.29	-1903.01	-1903.06	-1905.62	-1905.04	-1903.38	-1903.43	-1905.98	-1905.41
C50_270	-1903.37	-1903.43	-1905.98	-1905.41	-1903.32	-1903.38	-1905.93	-1905.37	-1903.1	-1903.15	-1905.71	-1905.13	-1903.48	-1903.54	-1906.08	-1905.52
C50_271	-1903.36	-1903.43	-1905.97	-1905.41	-1903.35	-1903.41	-1905.96	-1905.39	-1903.1	-1903.16	-1905.72	-1905.15	-1903.49	-1903.55	-1906.09	-1905.53
